# Supplementary material for: Vibronic optical spectroscopy of cryogenic flavin ions: the O2+ and N1 tautomers of protonated lumiflavin
Source: Royal Society of Chemistry journal article supplement (doi:10.1039/d0cp03650a), 2020-01-01
Supplement: d0cp03650a1.pdf [file d0cp03650a1.pdf]

## **Electronic Supporting Information**

### **Vibronic Optical Spectroscopy of Cryogenic Flavin Ions: The O2+ and N1 Tautomers of Protonated Lumiflavin**

David Müller and Otto Dopfer\*

*Institut für Optik und Atomare Physik, Technische Universität Berlin, Hardenbergstr. 36, D-10623 Berlin, Germany*

## Figure Captions

**Figure S1.** Photodissociation mass spectrum of H<sup>+</sup>LF recorded for excitation wavelength of 23128 cm<sup>-1</sup> (432.37 nm) assigned to the S<sub>1</sub> origin of the O2+ tautomer at a trap temperature of T=6 K. The branching ratio depends somewhat on the timing of the high-voltage extraction pulse of the reflectron time-of-flight mass spectrometer. In general, the branching ratio does not depend significantly on the excitation frequency, leading to essentially the same VISPD action spectra monitored in each fragment channel (Figure S2). The suggested assignment of the fragment peaks is provided in Table S1.

**Figure S2.** VISPD spectra of H<sup>+</sup>LF recorded in various fragmentation channels measured at a trap temperature of T=6 K. The spikes between 20500 and 21000 cm<sup>-1</sup> are not reproducible. The overview spectrum is recorded with the OPO laser at a step size of 0.5 nm (20 cm<sup>-1</sup> at 500 nm).

**Figure S3.** Structures of the less stable protomers of H<sup>+</sup>LF in the S<sub>0</sub> state obtained at the PBE0/cc-pVDZ level.

**Figure S4.** Vertical (S<sub>1</sub>-S<sub>4</sub>, T<sub>1</sub>-T<sub>4</sub>) excitation energies of various H<sup>+</sup>LF protomers and LF with respect to the S<sub>0</sub> energy computed at the PBE0/cc-pVDZ level. Triplet energies are reported in Table S7.

**Figure S5.** Vertical (S<sub>1</sub>-S<sub>4</sub>) and adiabatic (S<sub>1</sub>-S<sub>2</sub>) excitation energies of various H<sup>+</sup>LF protomers and LF with respect to S<sub>0</sub> computed at the PBE0/cc-pVDZ level.

**Figure S6.** Atomic NBO charge distribution in the S<sub>0</sub> and S<sub>1</sub> states of neutral LF (in 10<sup>-3</sup> e) evaluated at the PBE0/cc-pVDZ level.

**Figure S7.** Schematic visualization of in-plane normal modes m1-m12 of LF in the S<sub>1</sub> state calculated at the PBE0/cc-pVDZ level.

**Figure S8.** Schematic visualization of in-plane normal modes m1-m12 of H<sup>+</sup>LF(O2+) in the S<sub>1</sub> state calculated at the PBE0/cc-pVDZ level.

**Figure S9.** Laser-induced fluorescence excitation spectrum of the S<sub>1</sub> ← S<sub>0</sub> transition of LF in He droplets (Vdovin et al., Chem. Phys. **422**, 195 (2013)) compared to corresponding VISPD spectrum of H<sup>+</sup>LF. Corresponding transitions are connected by dotted lines.

**Figure S10.** Schematic visualization of low energy out-of-plane modes (n1-n8) of H<sup>+</sup>LF(N1) in the S<sub>1</sub> state calculated at the PBE0/cc-pVDZ level.

**Figure S11.** Comparison between Franck-Condon simulations for the S<sub>1</sub> ← S<sub>0</sub> transition of H<sup>+</sup>LF(N1) with planar structure (transition state) and slightly bent structure (minimum).

**Figure S12.** Comparison between Franck-Condon simulations for the  $S_1 \leftarrow S_0$  transition of various  $H^+LF$  protomers shown in Figure 1 and S3.

**Figure S13:** Absolute distances of neutral lumiflavin in its electronic ground state  $S_0$ . Geometry changes upon protonation (O2+/N1). Positive values indicate elongations, negative values indicate contractions. All values are given in pm.

**Figure S14.** Dependence of the intensity of the  $0^0$  transition of the  $H^+LF(O2+)$  protomer (top) and  $H^+LF(N1)$  protomer (bottom) as a function of the laser power. According to a least-square error analysis, the experimental data is better fitted by linear than a quadratic curve.

**Figure S15.** Comparison of VISPD spectrum of cryogenic  $H^+LF$  ins in the gas phase with absorption spectrum of LF and  $H^+LF$  in solution.

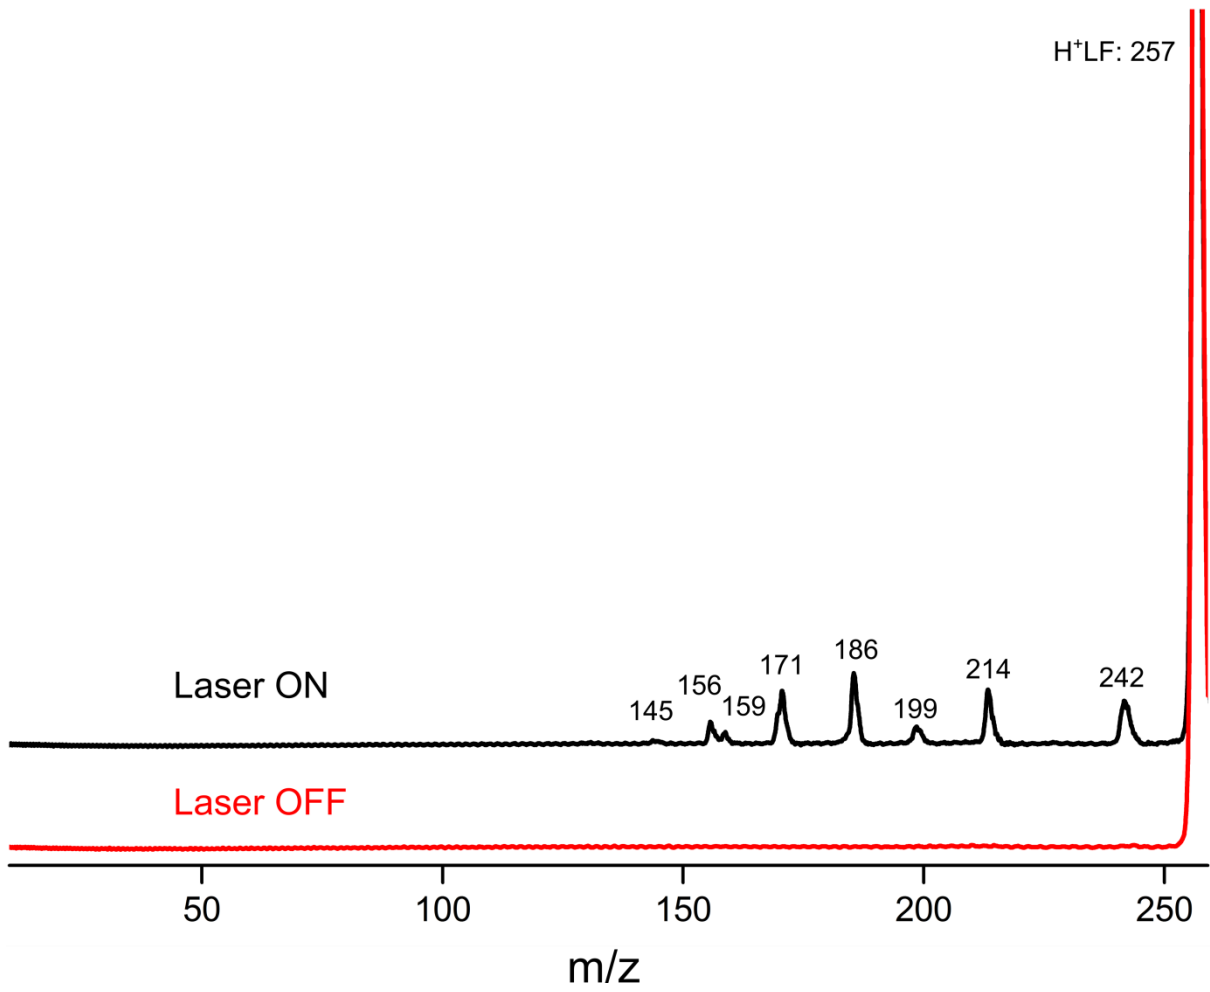

Figure S1

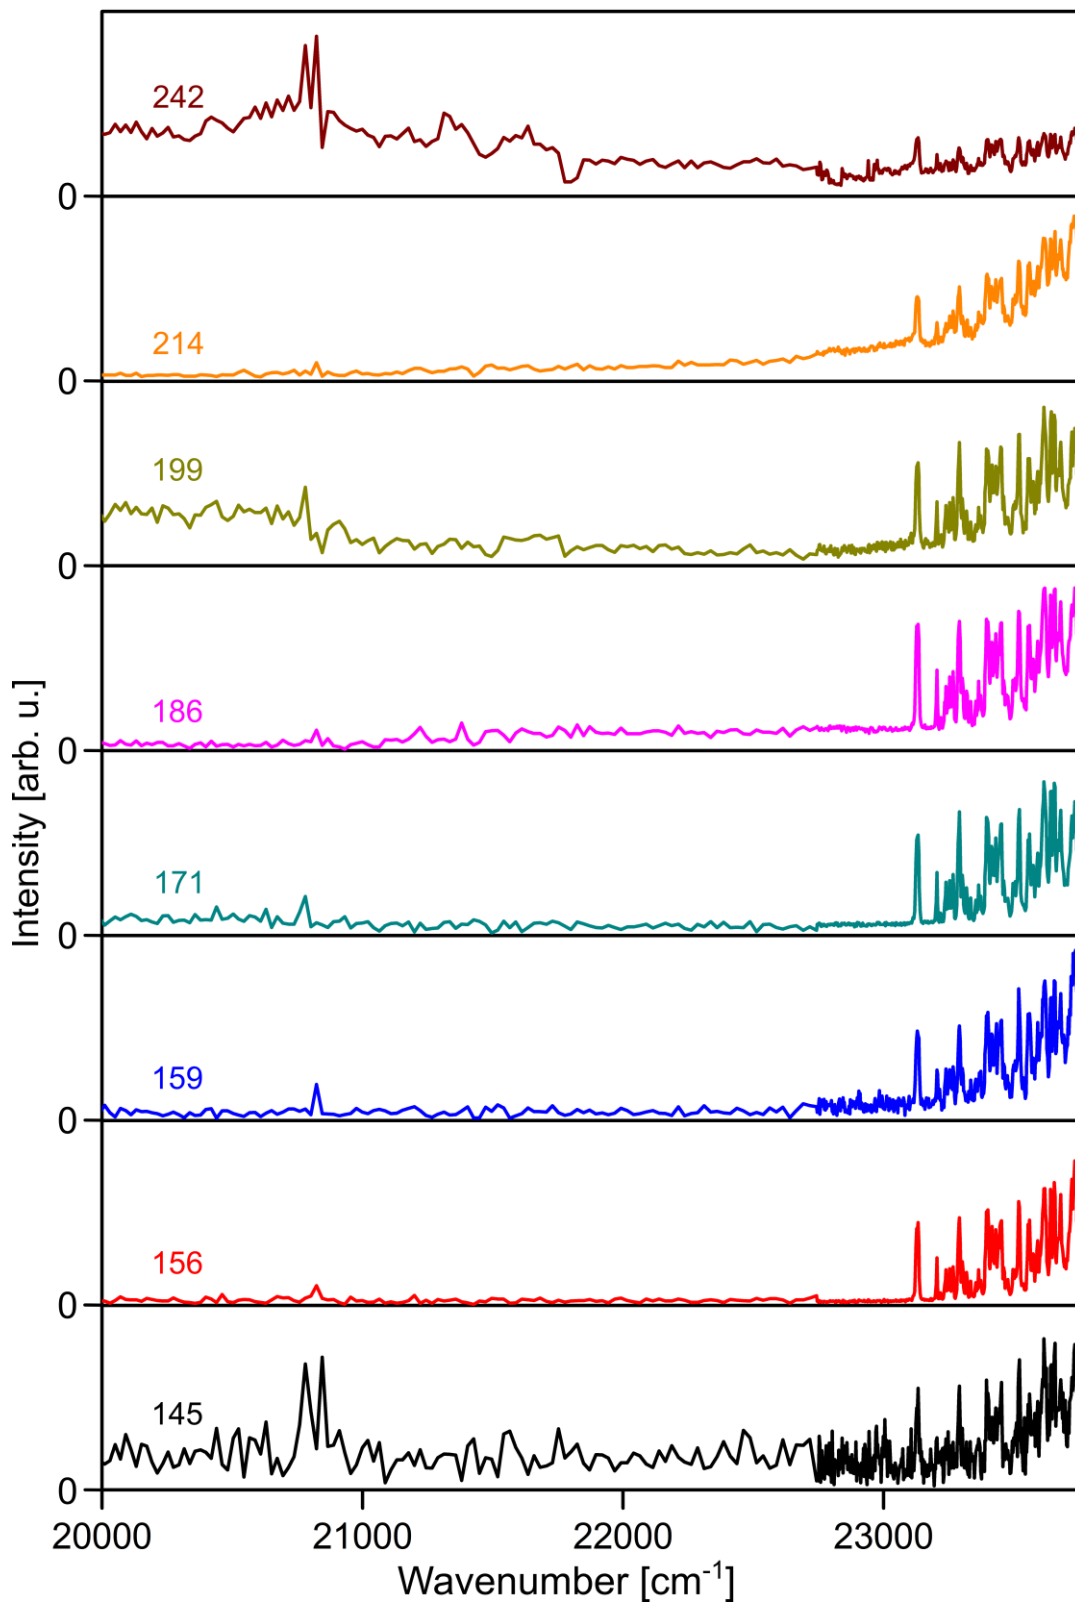

Figure S2

H<sup>+</sup>LF(O2-)

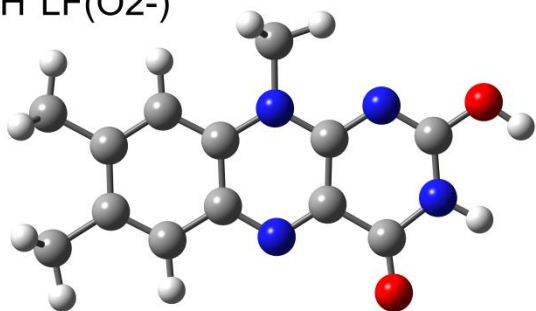

H<sup>+</sup>LF(O4+)

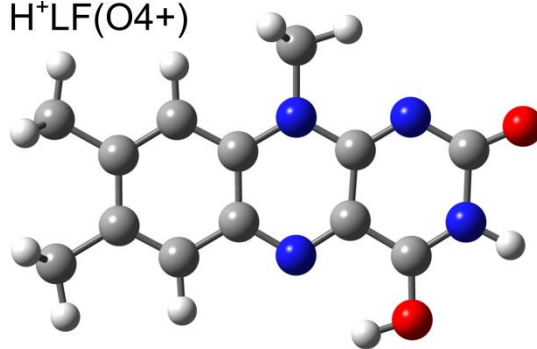

H<sup>+</sup>LF(N5)

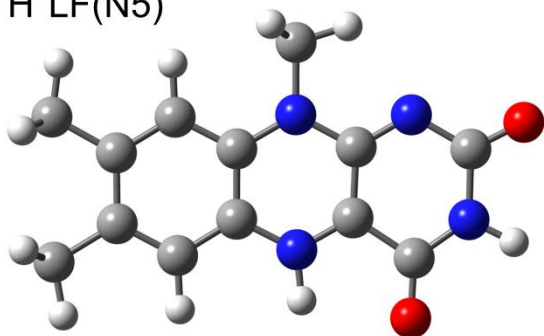

H<sup>+</sup>LF(OH++)

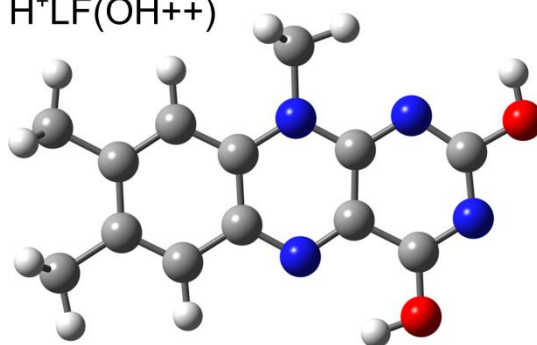

H<sup>+</sup>LF(OH+-)

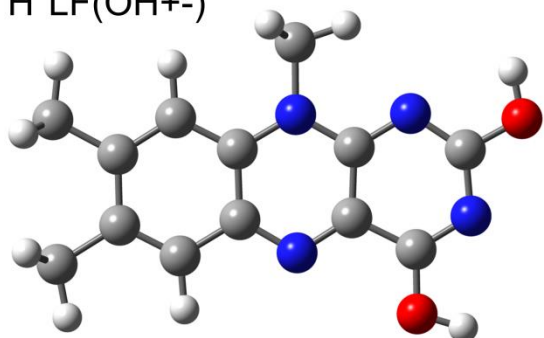

H<sup>+</sup>LF(O4-)

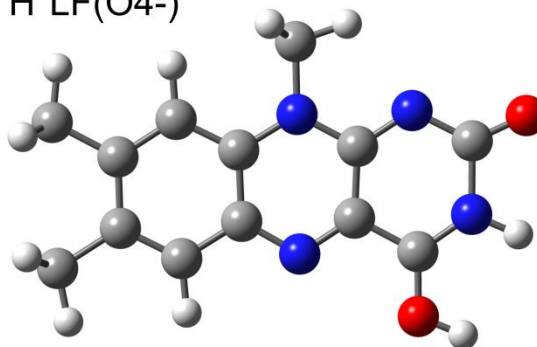

Figure S3

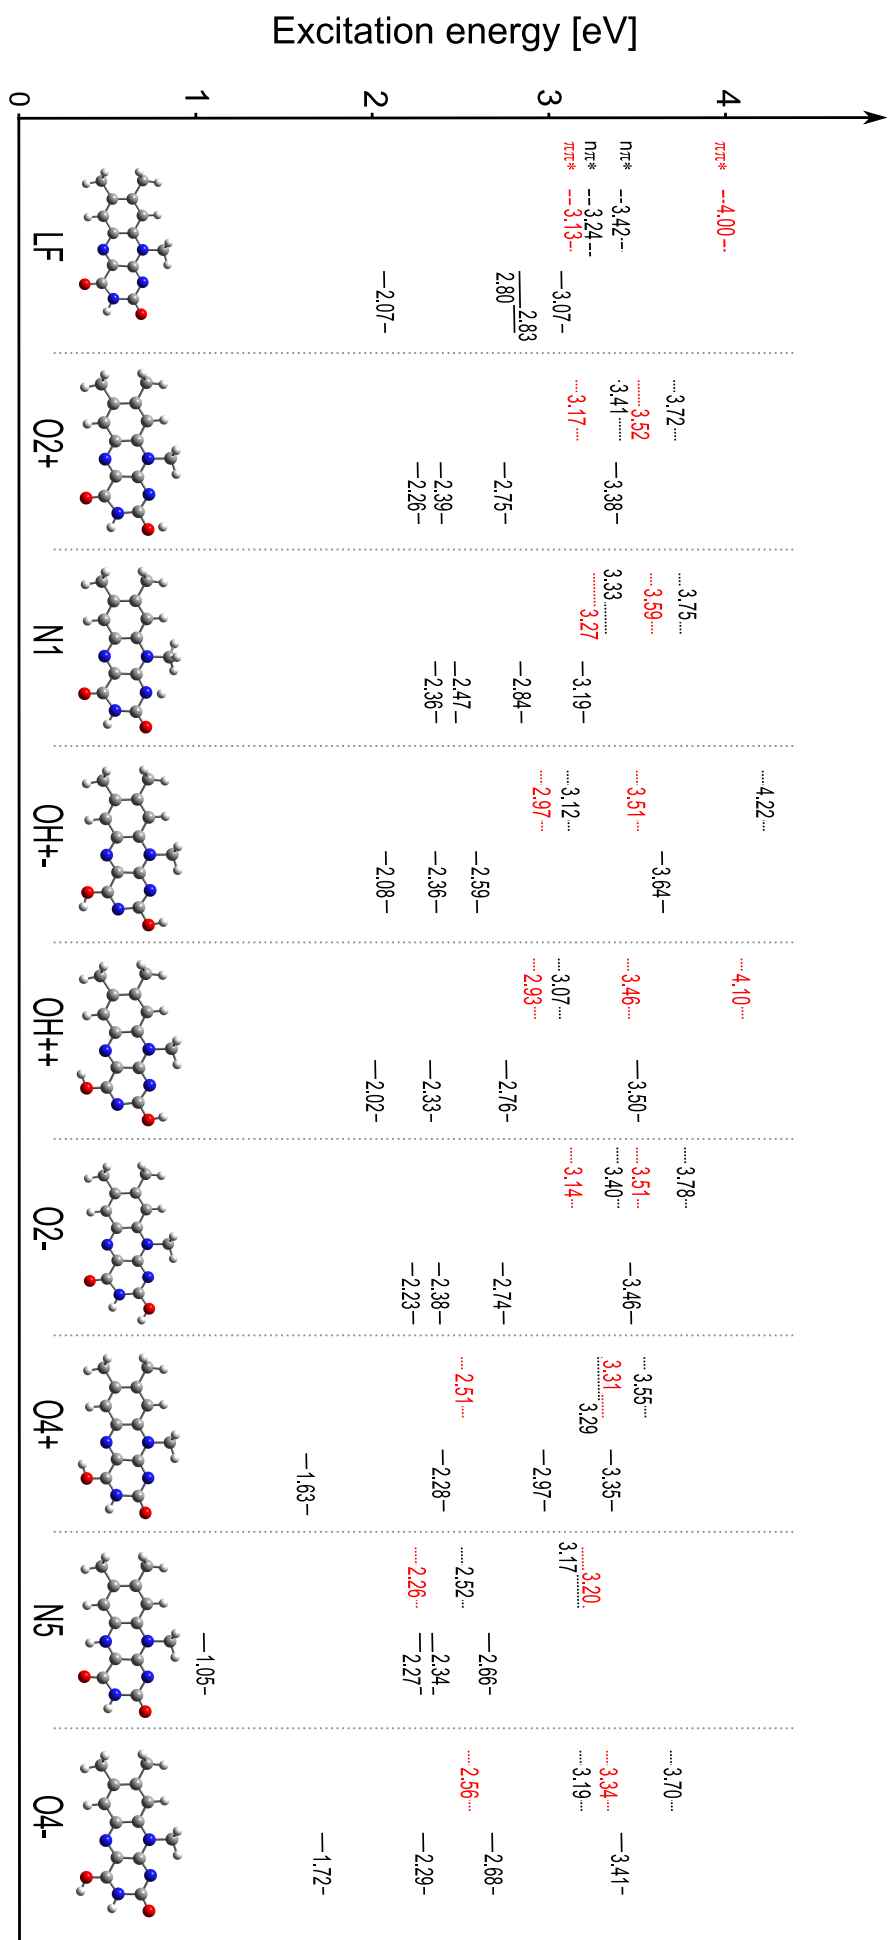

Figure S4

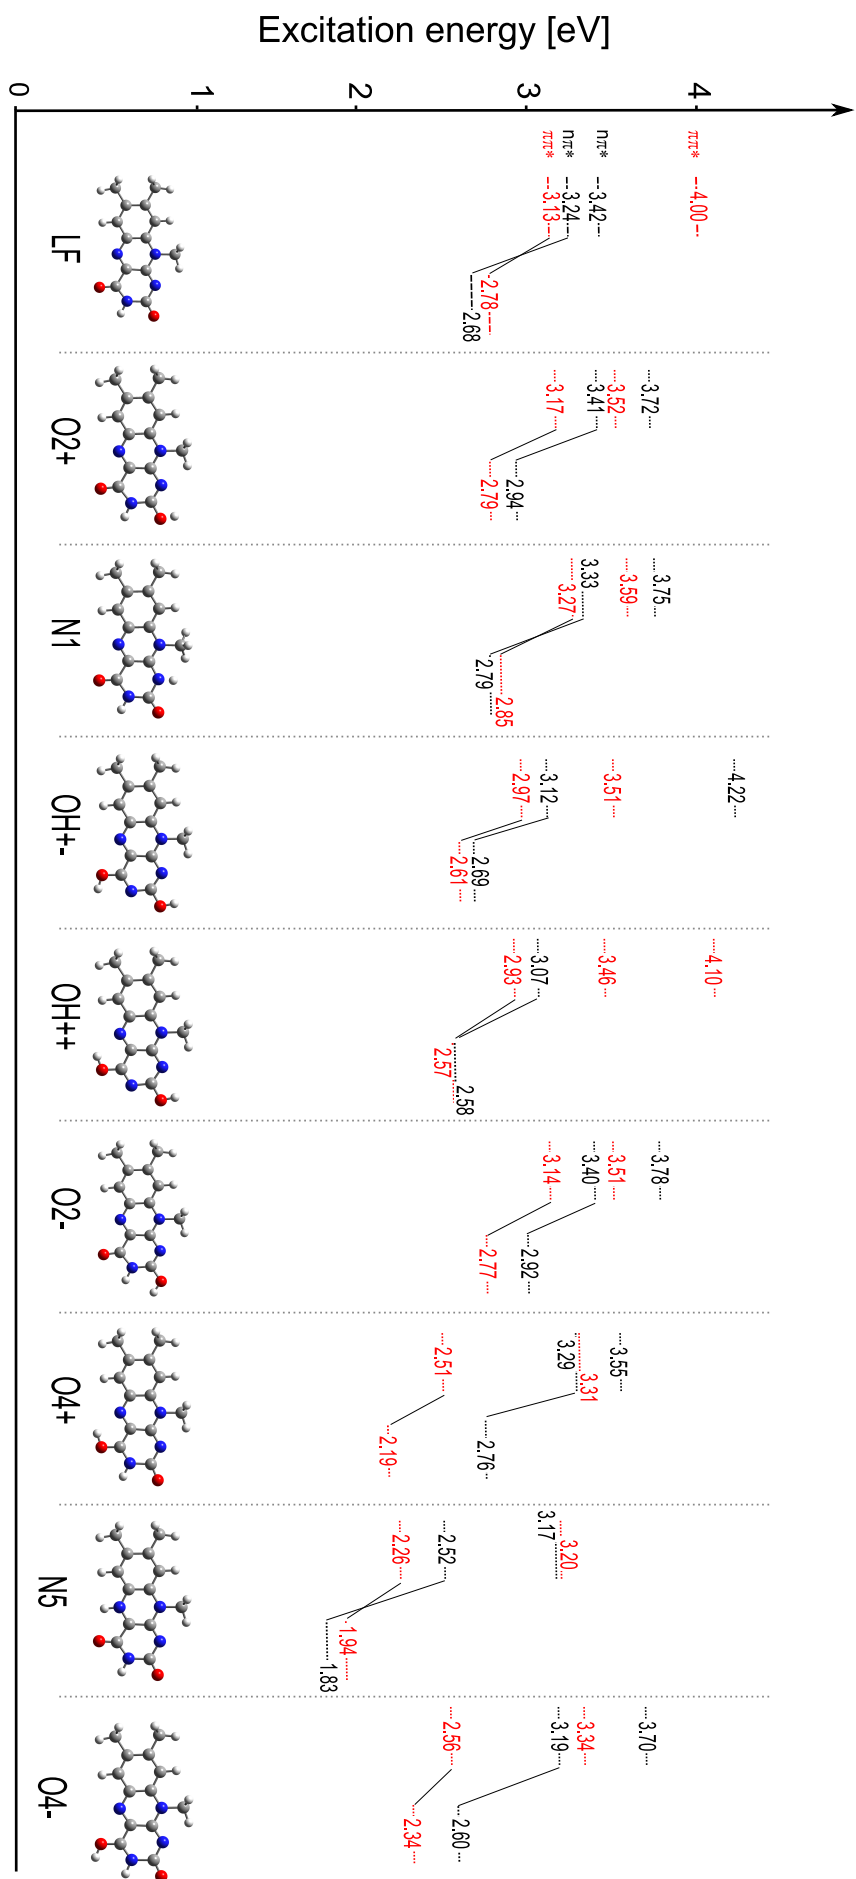

Figure S5



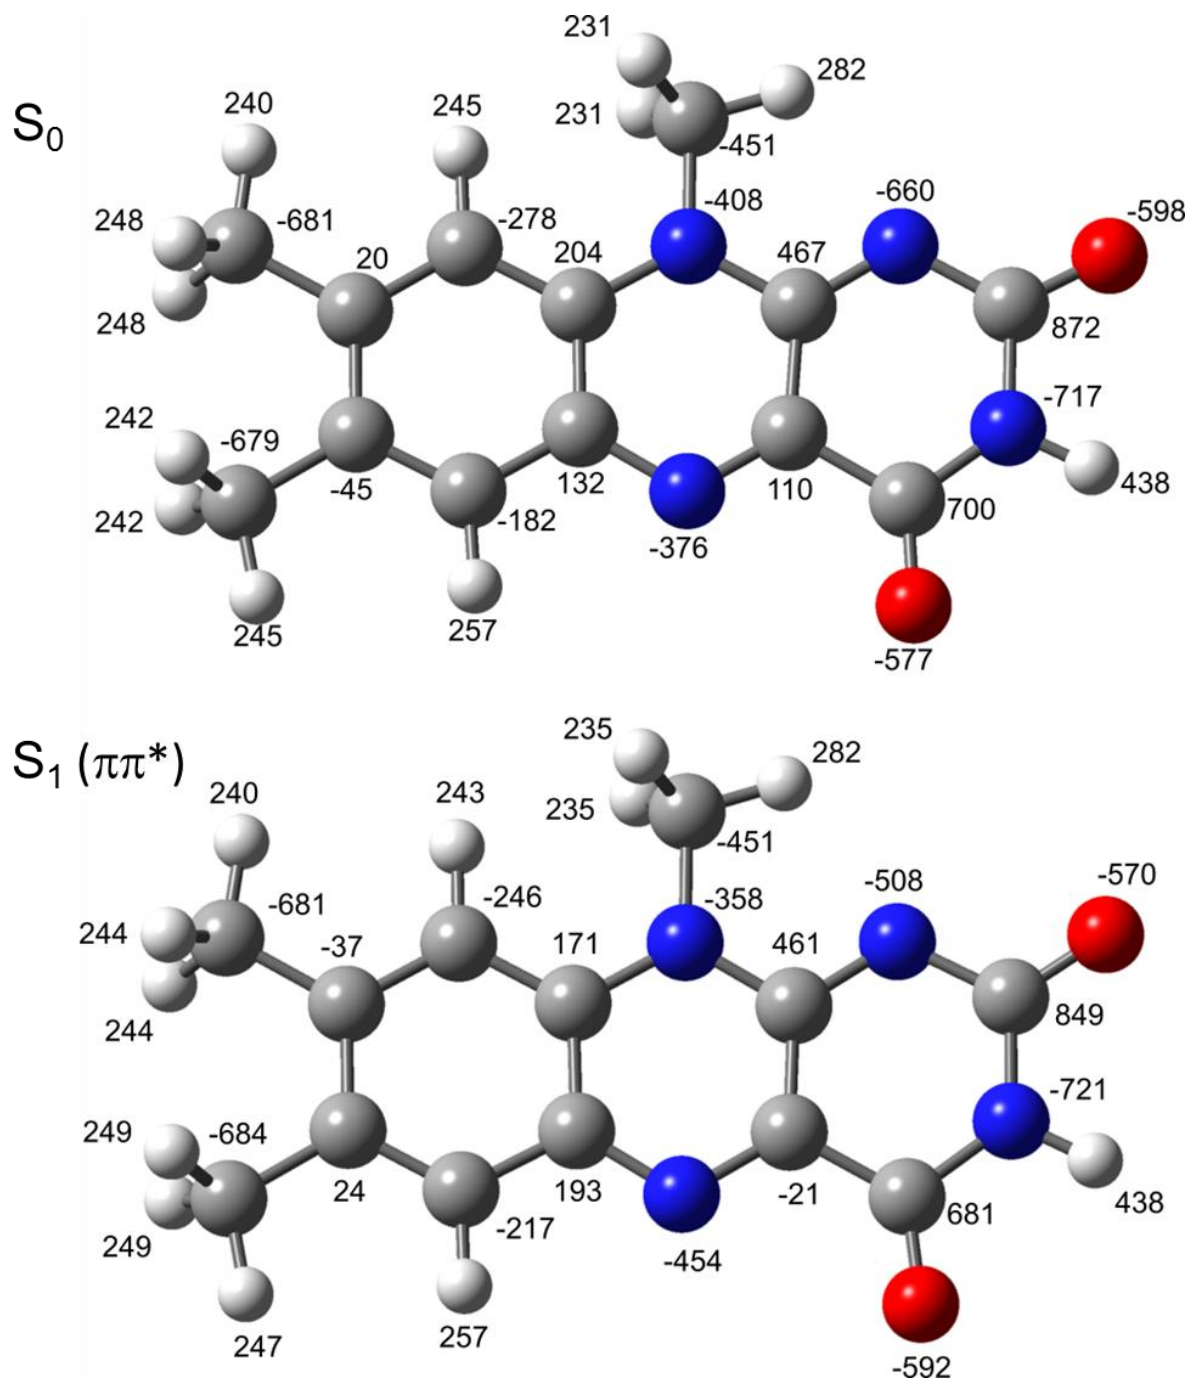

Figure S6

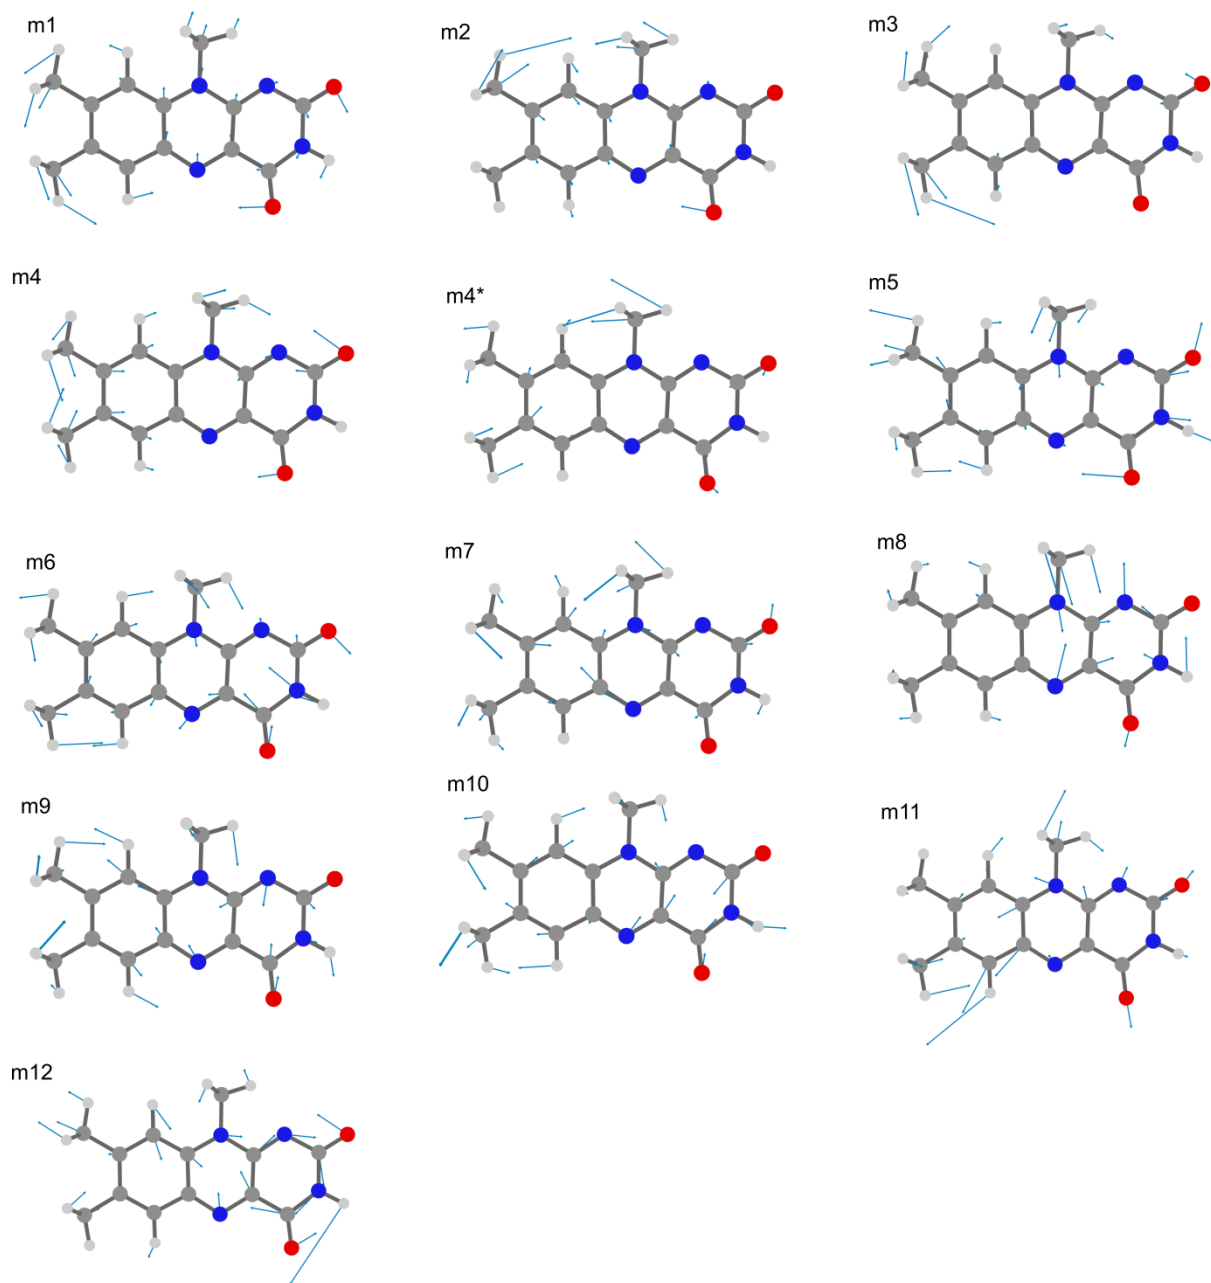

Figure S7

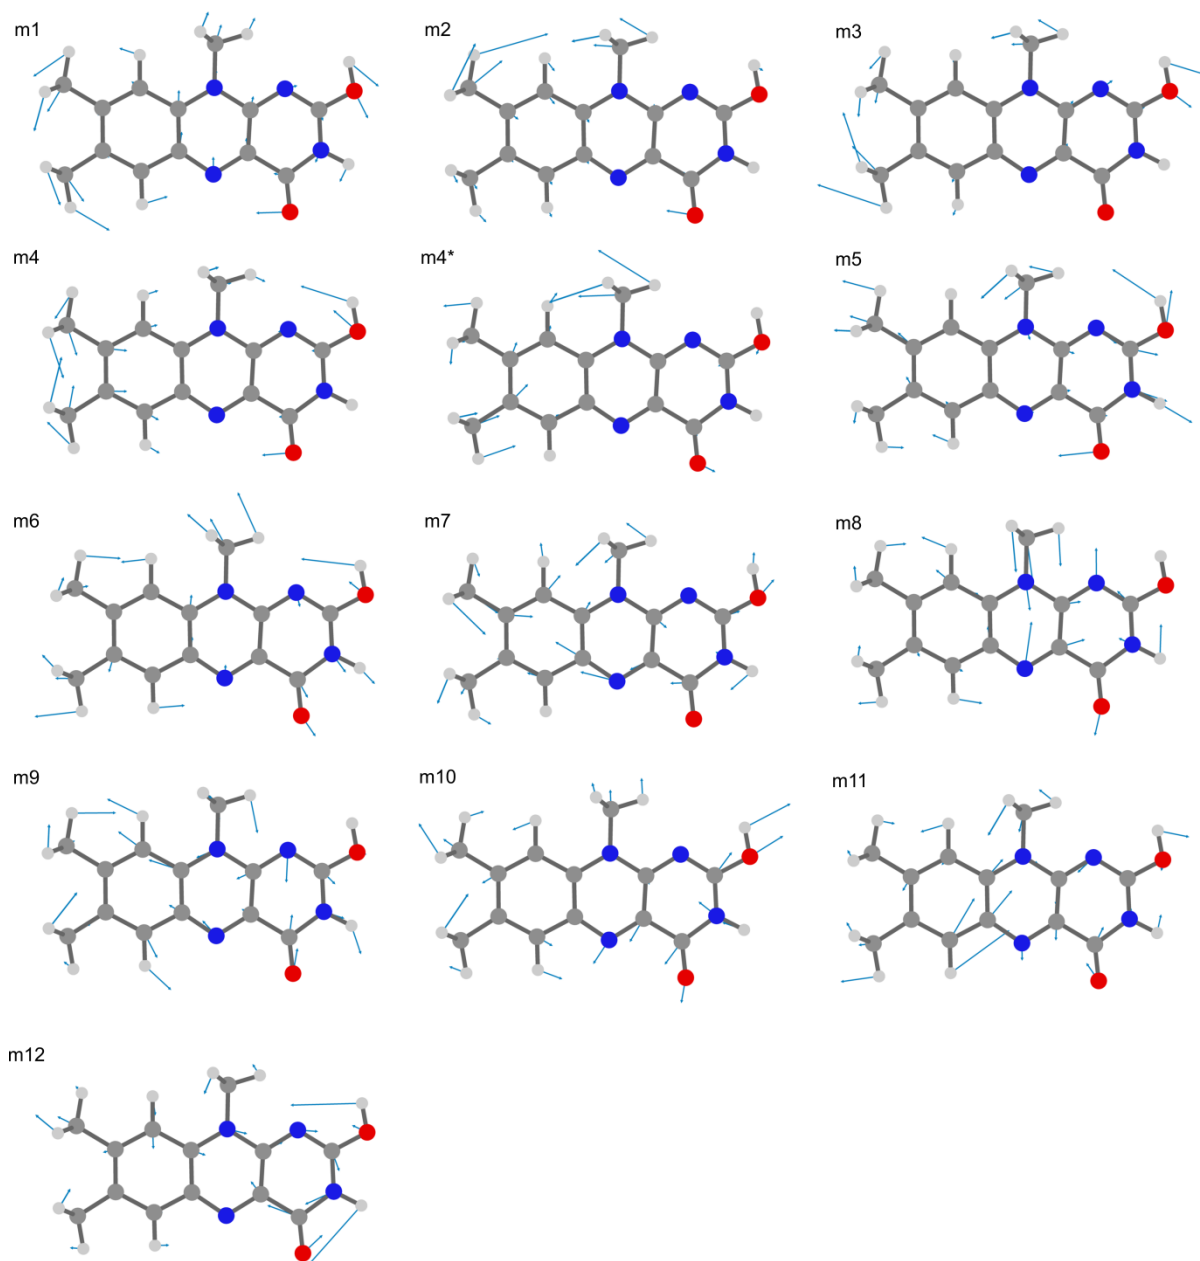

Figure S8

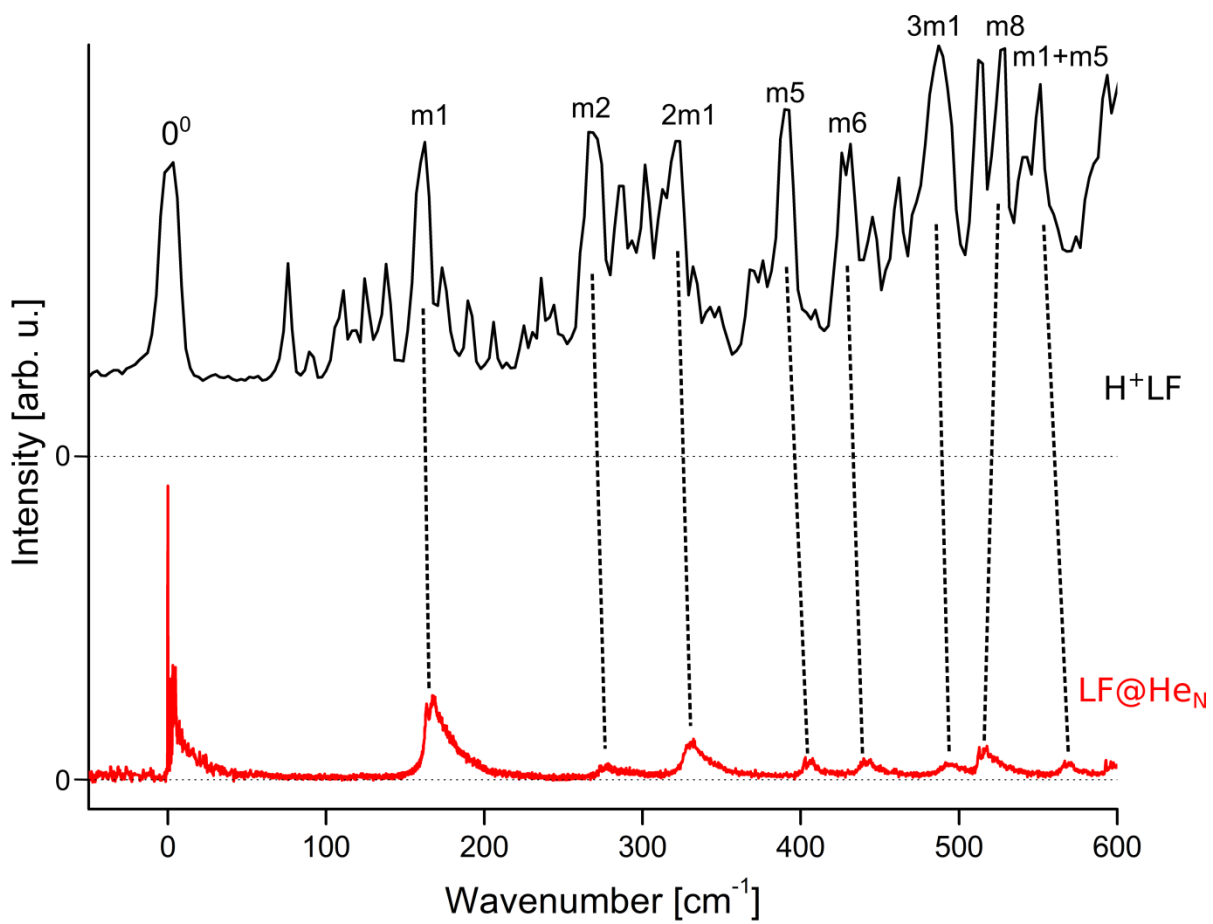

Figure S9

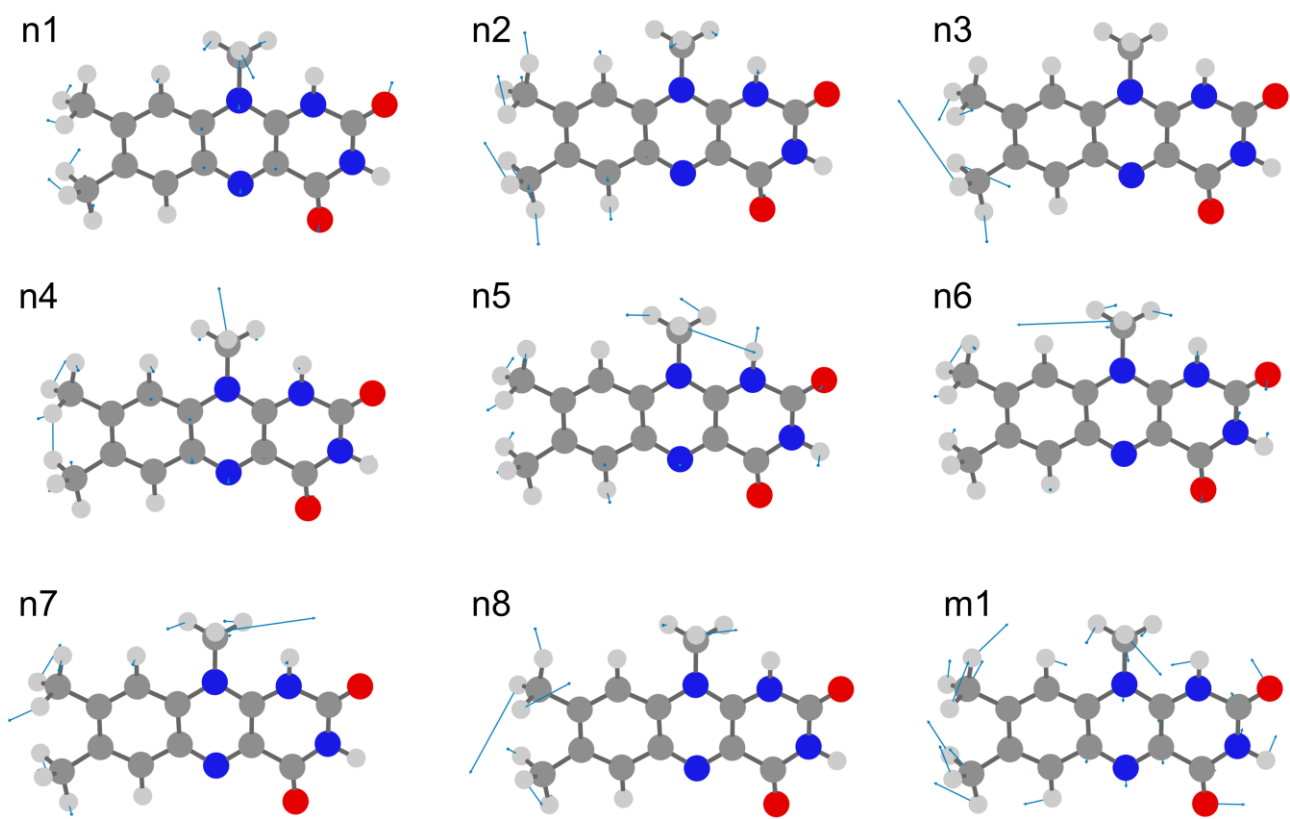

Figure S10

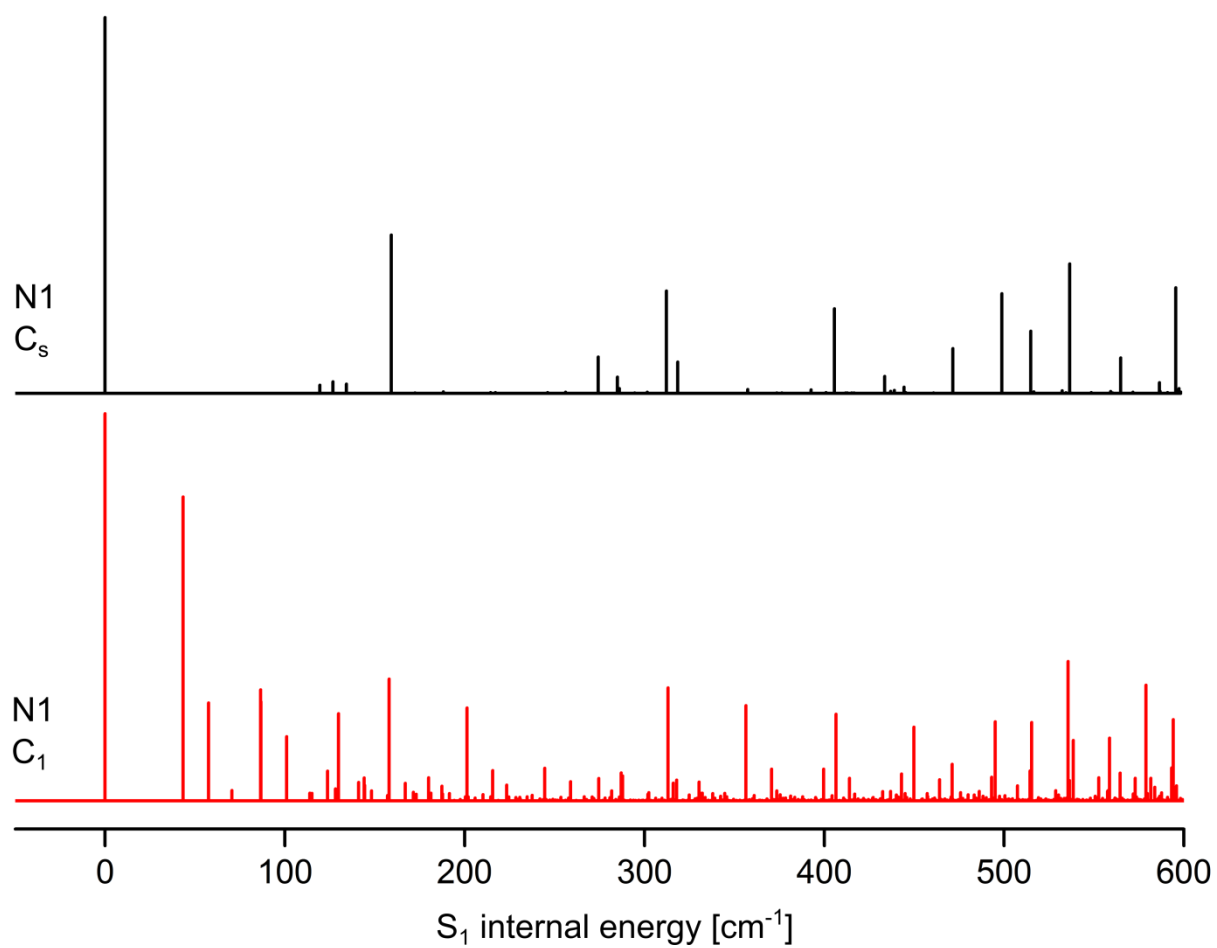

Figure S11

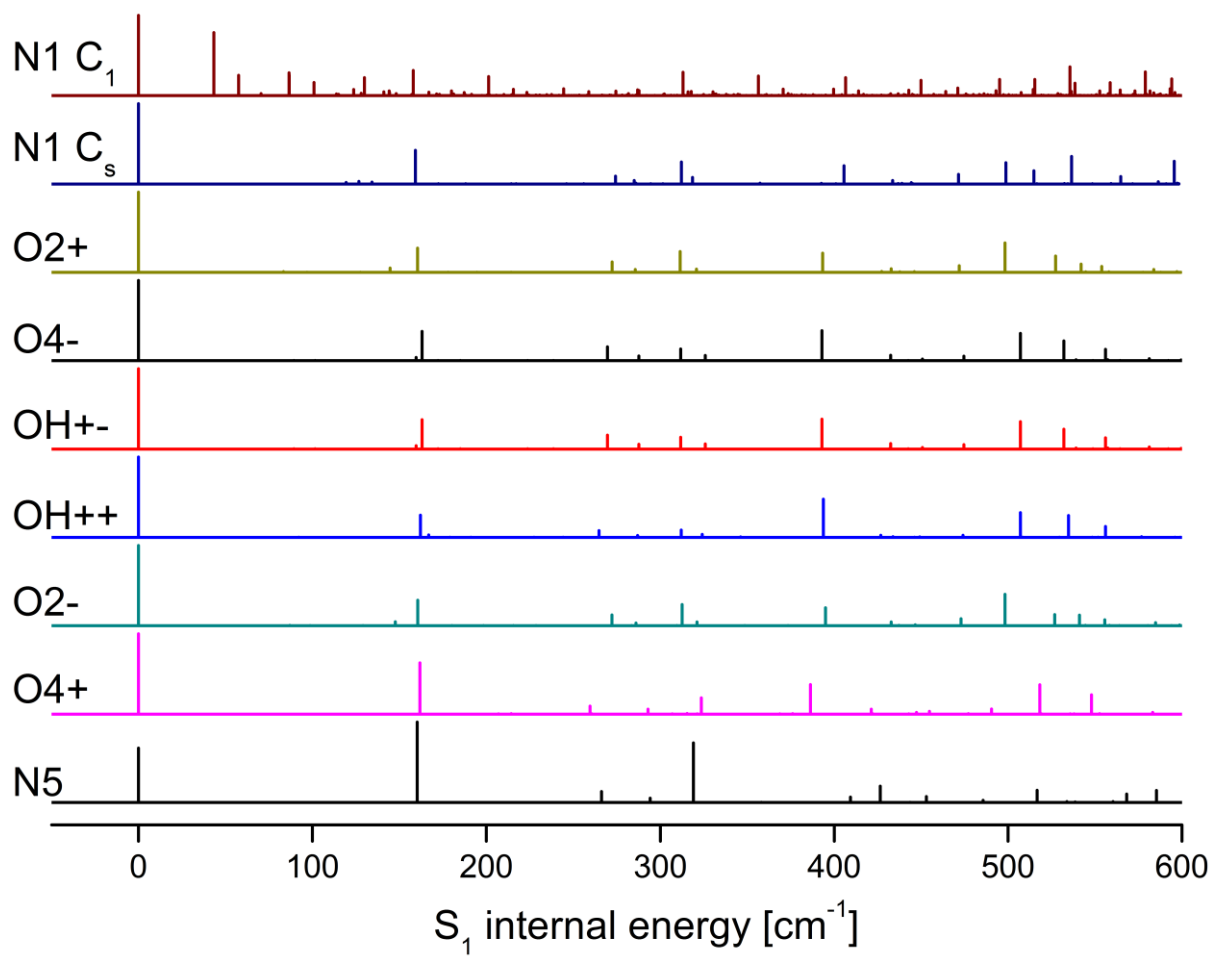

Figure S12

LF S<sub>0</sub>

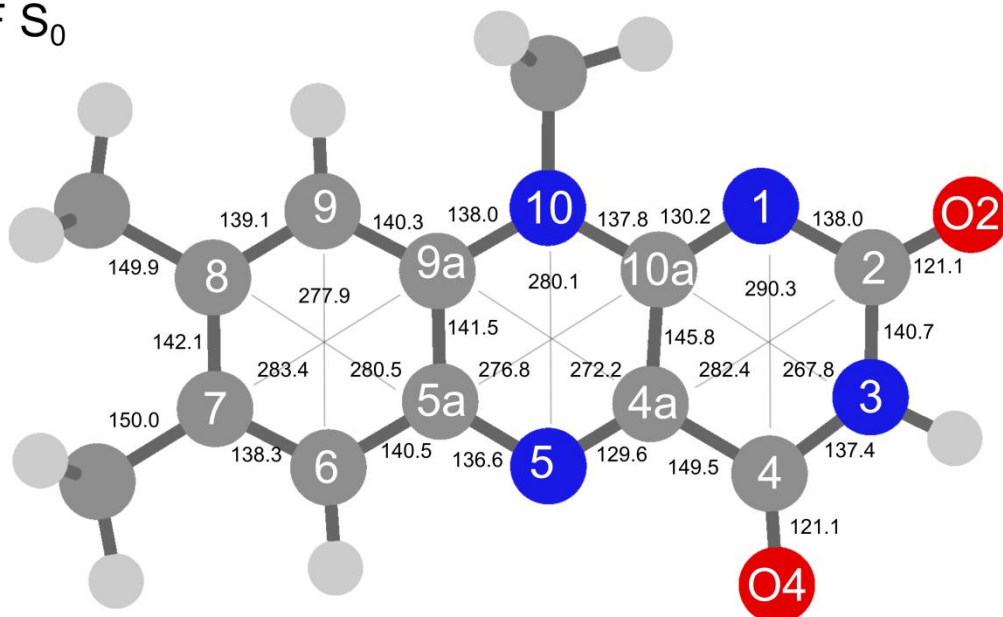

LF → H<sup>+</sup>LF(O2<sup>+</sup>/N1)

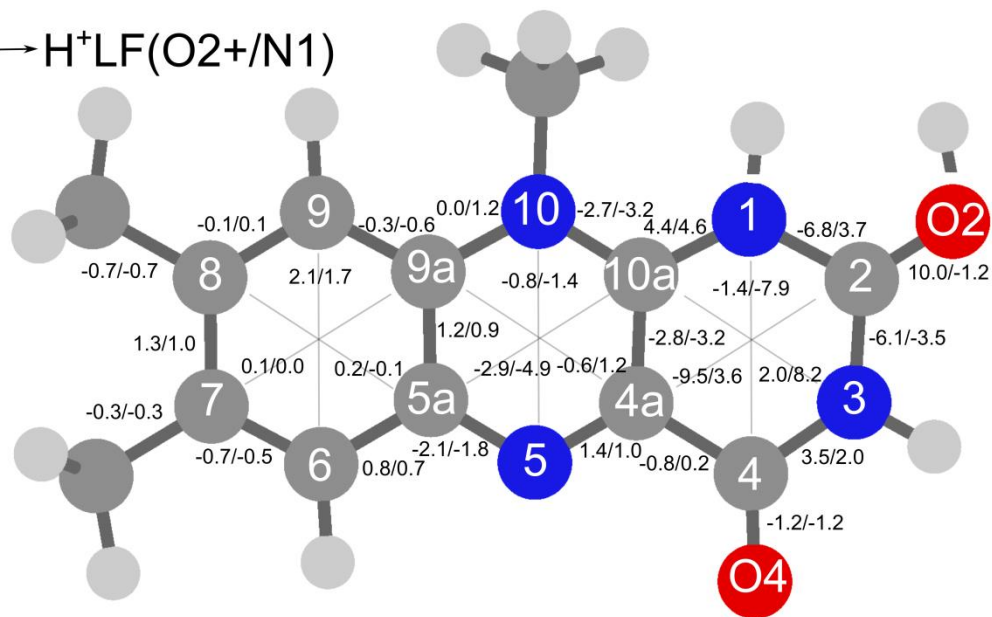

Figure S13



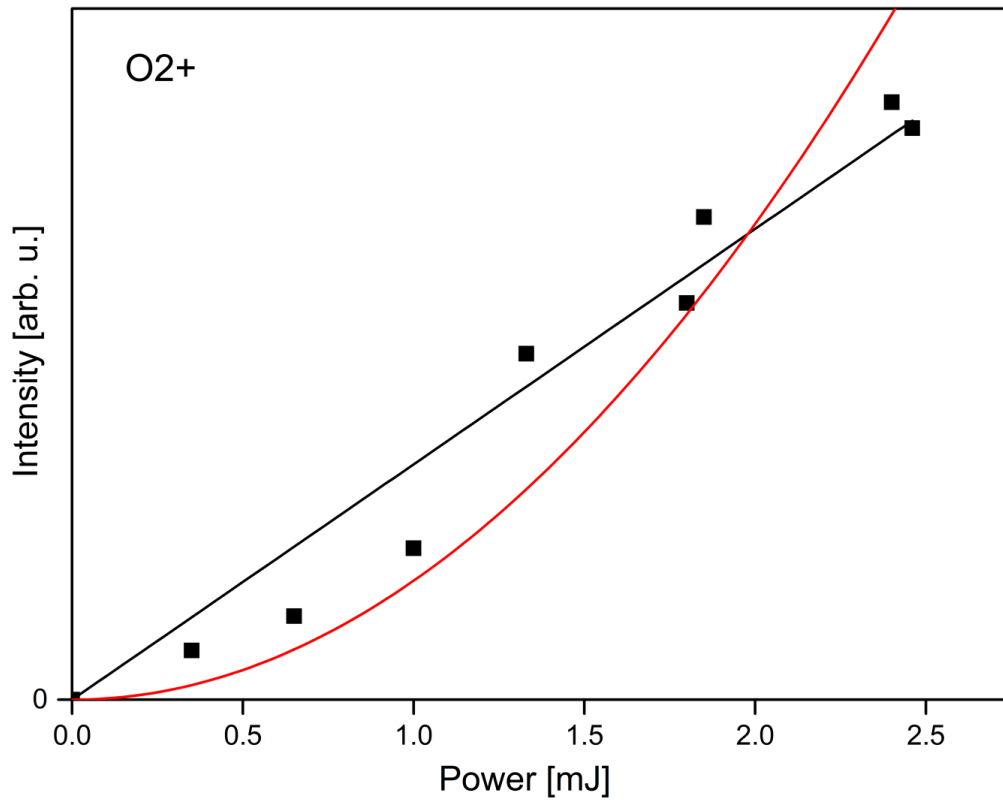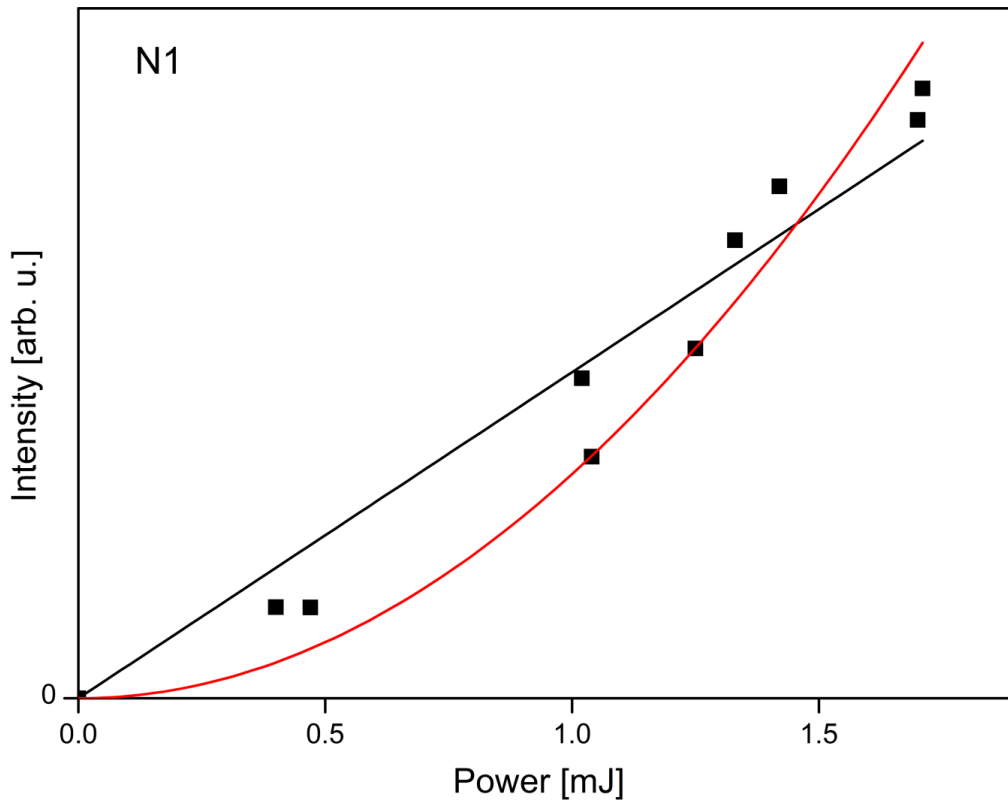

Figure S14

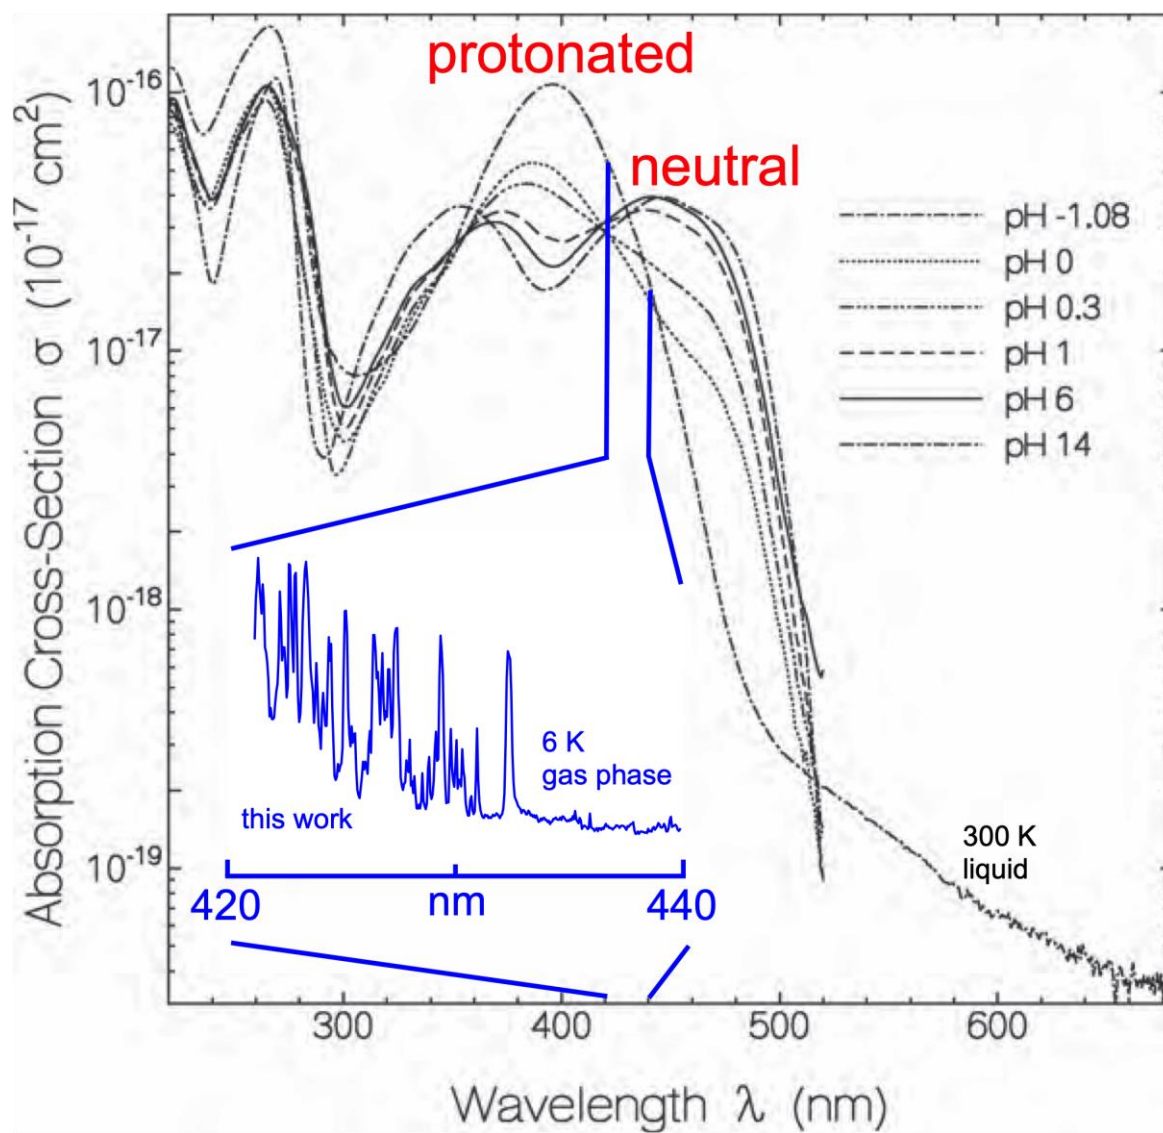

Figure S15

**Table S1.** Fragmentation channels of H<sup>+</sup>LF (m/z 257) observed upon VISPD and possible assignment of neutral fragment molecules.

| Fragment Ion (m/z) | Assignment                                                                   | Loss from H <sup>+</sup> LF (m/z) |
|--------------------|------------------------------------------------------------------------------|-----------------------------------|
| 145                | 2CO + CH <sub>3</sub> CN + CH <sub>3</sub><br>CO + CH <sub>3</sub> CN + OCNH | 112                               |
| 156                | OCNH + CO + 2CH <sub>3</sub>                                                 | 101                               |
| 159                | OCNH + CO + HCN                                                              | 98                                |
| 171                | OCNH + CO + CH <sub>3</sub>                                                  | 86                                |
| 186                | OCNH + CO                                                                    | 71                                |
| 199                | CH <sub>3</sub> + OCNH<br>CO + 2 CH <sub>3</sub>                             | 58                                |
| 214                | CO + CH <sub>3</sub><br>OCNH                                                 | 43                                |
| 242                | CH <sub>3</sub>                                                              | 15                                |

**Table S2.** Selected atomic charges (in e) of H<sup>+</sup>LF(O<sub>2</sub>+N<sub>1</sub>) and LF for the S<sub>0</sub> and S<sub>1</sub> states using natural bond orbital analysis (PBE0/cc-pVDZ).

|                                  | q <sub>H</sub> |                | q <sub>N5</sub> |                | q <sub>O4</sub> |                | q <sub>O2</sub> |                | q <sub>N1</sub> |                |
|----------------------------------|----------------|----------------|-----------------|----------------|-----------------|----------------|-----------------|----------------|-----------------|----------------|
|                                  | S <sub>0</sub> | S <sub>1</sub> | S <sub>0</sub>  | S <sub>1</sub> | S <sub>0</sub>  | S <sub>1</sub> | S <sub>0</sub>  | S <sub>1</sub> | S <sub>0</sub>  | S <sub>1</sub> |
| <b>O<sub>2</sub><sup>+</sup></b> | 0.521          | 0.517          | -0.336          | -0.457         | -0.507          | -0.533         | -0.639          | -0.645         | -0.671          | -0.655         |
| <b>N<sub>1</sub></b>             | 0.462          | 0.457          | -0.327          | -0.456         | -0.508          | -0.530         | -0.555          | -0.574         | -0.671          | -0.659         |
| <b>LF</b>                        |                |                | -0.376          | -0.454         | -0.577          | -0.592         | -0.598          | -0.570         | -0.660          | -0.508         |

**Table S3.** Calculated frequencies (in  $\text{cm}^{-1}$ ) of  $\text{H}^+\text{LF}(\text{O}_2^+)$  for the  $\text{S}_0$  and  $\text{S}_1$  states at the PBE0/cc-pVDZ level of theory. Frequencies are listed according to symmetry following the Mullikan notation.

| $\text{S}_0$ |             | $\text{S}_1$ |             |
|--------------|-------------|--------------|-------------|
| $\text{a}''$ | $\text{a}'$ | $\text{a}''$ | $\text{a}'$ |
| 50.91        | 164.25      | 41.67        | 160.42      |
| 61.00        | 281.26      | 55.14        | 272.39      |
| 102.56       | 298.26      | 72.36        | 285.68      |
| 134.29       | 322.24      | 88.95        | 311.49      |
| 149.23       | 357.74      | 141.89       | 348.26      |
| 164.24       | 398.21      | 152.99       | 393.39      |
| 177.48       | 431         | 158.43       | 427.30      |
| 193.66       | 497.66      | 176.05       | 498.28      |
| 207.08       | 531.75      | 195.42       | 527.39      |
| 266.53       | 548.9       | 218.89       | 541.95      |
| 347.46       | 603.25      | 311.51       | 603.27      |
| 400.17       | 642.12      | 346.47       | 631.04      |
| 465.55       | 650.26      | 388.87       | 647.84      |
| 536.68       | 758.05      | 453.14       | 747.29      |
| 562.93       | 790.12      | 537.15       | 787.16      |
| 639.88       | 838.75      | 586.08       | 830.83      |
| 675.21       | 894.65      | 640.79       | 893.72      |
| 731.54       | 998.83      | 697.71       | 992.97      |
| 757.96       | 1023.89     | 737.35       | 1007.58     |
| 782.37       | 1030.1      | 743.71       | 1026.94     |
| 837.02       | 1090.02     | 793.81       | 1080.10     |
| 868.33       | 1112.68     | 871.33       | 1103.48     |
| 921.80       | 1176.55     | 900.03       | 1166.80     |
| 1029.66      | 1184.46     | 990.18       | 1177.52     |
| 1053.37      | 1214.26     | 1039.02      | 1208.38     |
| 1133.92      | 1248.13     | 1127.24      | 1229.47     |
| 1438.16      | 1261.77     | 1413.95      | 1255.73     |
| 1454.48      | 1309.35     | 1449.42      | 1272.21     |
| 1472.41      | 1329.83     | 1474.99      | 1319.26     |
| 3134.36      | 1354.52     | 3089.84      | 1342.48     |
| 3138.27      | 1372.71     | 3134.53      | 1351.39     |
| 3186.33      | 1384.95     | 3152.86      | 1361.99     |
|              | 1395.14     |              | 1382.53     |
|              | 1405.22     |              | 1392.81     |
|              | 1426.54     |              | 1400.65     |
|              | 1432.96     |              | 1414.90     |
|              | 1452.65     |              | 1442.95     |
|              | 1464.6      |              | 1450.31     |
|              | 1482.7      |              | 1464.76     |
|              | 1506.29     |              | 1470.27     |
|              | 1545.15     |              | 1485.36     |
|              | 1550.12     |              | 1526.85     |
|              | 1620.26     |              | 1564.94     |
|              | 1634.99     |              | 1595.28     |
|              | 1650.21     |              | 1635.10     |
|              | 1681.71     |              | 1664.09     |
|              | 1700.67     |              | 1703.13     |
|              | 1889.33     |              | 1855.31     |
|              | 3062.16     |              | 3031.46     |
|              | 3064.36     |              | 3060.97     |
|              | 3092.97     |              | 3068.84     |
|              | 3180.5      |              | 3177.19     |
|              | 3181.28     |              | 3188.41     |
|              | 3235.34     |              | 3227.03     |
|              | 3246.62     |              | 3230.26     |
|              | 3249.32     |              | 3240.20     |
|              | 3586.67     |              | 3590.35     |
|              | 3770.09     |              | 3779.48     |

**Table S4.** Calculated frequencies (in  $\text{cm}^{-1}$ ) of  $\text{H}^+\text{LF}(\text{N}1)$  for the  $\text{S}_0$  and  $\text{S}_1$  state at the PBE0/cc-pVDZ level of theory.

| $\text{S}_0$<br>a'' | $\text{S}_1$<br>a'' |         |         |
|---------------------|---------------------|---------|---------|
| 47.25               | 43.30               | 1437.69 | 1421.82 |
| 61.67               | 57.56               | 1438.94 | 1440.41 |
| 97.64               | 70.49               | 1454.55 | 1449.43 |
| 105.55              | 86.50               | 1458.87 | 1461.92 |
| 132.34              | 123.69              | 1469.58 | 1467.76 |
| 133.59              | 132.29              | 1493.96 | 1470.65 |
| 140.89              | 144.39              | 1496.71 | 1479.05 |
| 163.27              | 148.19              | 1519.79 | 1486.87 |
| 181.45              | 157.98              | 1563.24 | 1524.46 |
| 199.12              | 179.96              | 1573.27 | 1566.79 |
| 249.75              | 197.55              | 1630.79 | 1590.04 |
| 289.00              | 274.56              | 1675.56 | 1636.99 |
| 298.62              | 287.08              | 1701.75 | 1686.57 |
| 324.23              | 287.96              | 1882.05 | 1856.35 |
| 339.66              | 313.11              | 1909.16 | 1893.05 |
| 374.94              | 333.72              | 3062.37 | 3026.97 |
| 388.29              | 365.56              | 3065.09 | 3062.42 |
| 410.95              | 378.50              | 3088.26 | 3062.60 |
| 431.05              | 406.63              | 3134.91 | 3083.74 |
| 457.31              | 427.19              | 3139.56 | 3136.88 |
| 498.21              | 440.13              | 3180.47 | 3161.58 |
| 517.34              | 495.11              | 3182.29 | 3177.82 |
| 525.77              | 515.37              | 3188.52 | 3190.58 |
| 543.62              | 535.64              | 3223.75 | 3192.89 |
| 572.52              | 547.93              | 3235.85 | 3226.62 |
| 596.63              | 583.82              | 3246.27 | 3233.83 |
| 630.98              | 594.13              | 3596.50 | 3606.75 |
| 637.87              | 614.55              | 3630.52 | 3634.84 |
| 660.74              | 629.07              |         |         |
| 666.82              | 659.90              |         |         |
| 720.19              | 686.67              |         |         |
| 756.04              | 714.76              |         |         |
| 764.55              | 745.19              |         |         |
| 774.40              | 761.75              |         |         |
| 786.51              | 780.88              |         |         |
| 820.71              | 786.29              |         |         |
| 841.61              | 836.09              |         |         |
| 862.58              | 871.07              |         |         |
| 879.21              | 877.60              |         |         |
| 923.12              | 895.66              |         |         |
| 996.67              | 985.61              |         |         |
| 1017.54             | 990.16              |         |         |
| 1025.43             | 1005.42             |         |         |
| 1028.87             | 1013.45             |         |         |
| 1035.83             | 1035.68             |         |         |
| 1053.19             | 1039.94             |         |         |
| 1109.51             | 1101.67             |         |         |
| 1121.85             | 1117.14             |         |         |
| 1183.01             | 1175.21             |         |         |
| 1196.61             | 1181.11             |         |         |
| 1228.29             | 1213.63             |         |         |
| 1266.79             | 1259.28             |         |         |
| 1295.22             | 1271.74             |         |         |
| 1306.95             | 1304.47             |         |         |
| 1349.22             | 1331.30             |         |         |
| 1366.03             | 1333.91             |         |         |
| 1383.21             | 1343.32             |         |         |
| 1392.52             | 1378.12             |         |         |
| 1400.55             | 1379.92             |         |         |
| 1424.64             | 1396.92             |         |         |
| 1430.40             | 1408.50             |         |         |
| 1435.61             | 1416.17             |         |         |

**Table S5.** Possible peak assignment of the sharp peaks a-t in the VISPD spectrum of H<sup>+</sup>LF to low-frequency a" modes of the H<sup>+</sup>LF(O<sub>2</sub><sup>+</sup>) isomer.

| Peak | Exp     | Calc O <sub>2</sub> <sup>+</sup> | a" modes               |
|------|---------|----------------------------------|------------------------|
|      | 75      | 83, 72                           | 2x42, 72               |
| a    | 90      | 97, 89                           | 42+55, 89              |
| b    | 104     | 97                               | 42+55                  |
| c    | 110/111 | 110                              | 2x55                   |
| d    | 117     | 114                              | 42+72                  |
| e    | 124     | 131                              | 42+89                  |
| f    | 127     | 131                              | 42+89                  |
| g    | 132     | 131                              | 42+89                  |
| h    | 138     | 144                              | 55+89                  |
| i    | 165     | 161                              | 72+89                  |
| j    | 174/176 | 178                              | 2x89                   |
| k    | 180     | 178                              | 2x89                   |
| l    | 190     | 195                              | 153+42                 |
| m    | 206     | 200                              | 158+42                 |
| n    | 214     | 214                              | 158+55, 142+72         |
| o    | 225     | 225                              | 153+72                 |
| p    | 231     | 231                              | 158+72, 89+142, 55+176 |
| q    | 237     | 237                              | 195+42                 |
| r    | 241     | 242                              | 153+89                 |
| s    | 245     | 247                              | 158+89                 |
| t    | 262     | 261                              | 219+42                 |

**Table S6.** Adiabatic S<sub>1</sub> energies of LC, LF, and various protonated tautomers computed at the PBE0/cc-pVDZ level compared to available experimental values (in cm<sup>-1</sup>).

| tautomer                    | H <sup>+</sup> LC (S <sub>1</sub> ) calc <sup>a</sup> | H <sup>+</sup> LC (S <sub>1</sub> ) exp <sup>a</sup> | H <sup>+</sup> LF (S <sub>1</sub> ) calc | H <sup>+</sup> LF (S <sub>1</sub> ) exp |
|-----------------------------|-------------------------------------------------------|------------------------------------------------------|------------------------------------------|-----------------------------------------|
| neutral                     | 24826                                                 |                                                      | 22448                                    | 21511 <sup>b</sup>                      |
| N1                          | -                                                     | -                                                    | 23025                                    | 23202                                   |
| O <sub>2</sub> <sup>+</sup> | 22422                                                 |                                                      | 22535                                    | 23128                                   |
| O <sub>2</sub> <sup>-</sup> |                                                       |                                                      | 22341                                    |                                         |
| O <sub>4</sub> <sup>+</sup> | 18451                                                 |                                                      | 17682                                    |                                         |
| O <sub>4</sub> <sup>-</sup> |                                                       |                                                      | 18046                                    |                                         |
| N5                          | 19153                                                 | 19962                                                | 15622                                    |                                         |
| N10                         | 22555                                                 |                                                      | -                                        | -                                       |

<sup>a</sup> Sheldrick et al., Phys. Chem. Chem. Phys. **20**, 7407 (2018)

<sup>b</sup> Vdovin et al., Chem. Phys. **422**, 195 (2013)

**Table S7.** Vertical and adiabatic triplet excitation energies computed at the PBE0/cc-pVDZ level with respect to the optimized electronic ground state  $S_0$  (in  $\text{cm}^{-1}$ ).

|      | $T_1$         | $T_2$ | $T_3$ | $T_4$ |
|------|---------------|-------|-------|-------|
|      | $E_v(E_a)$    | $E_v$ | $E_v$ | $E_v$ |
| LF   | 16699         | 22605 | 22791 | 24748 |
| O2+  | 18250 (16522) | 19301 | 22186 | 27250 |
| N1   | 19009 (17413) | 19957 | 22906 | 25715 |
| O2-  | 17947 (16258) | 19215 | 22135 | 27898 |
| O4+  | 13175 (11803) | 18361 | 23981 | 26980 |
| N5   | 8469 (7745)   | 18280 | 18910 | 21491 |
| OH++ | 16266 (14615) | 18765 | 22281 | 28217 |
| OH+- | 16743 (15005) | 19073 | 20896 | 29350 |
| O4-  | 16743 (12372) | 19073 | 20896 | 29350 |

**Table S8.** Optimized geometries of  $S_0$ - $S_2$  of LF and  $H^+$ LF shown in Figure 1 and Figure S3**LF  $S_0$** 

|   |             |             |             |
|---|-------------|-------------|-------------|
| C | 3.38348600  | 0.85042200  | -0.00001600 |
| C | 2.16039400  | 1.49512100  | -0.00003800 |
| C | 0.94383400  | 0.78947700  | -0.00002300 |
| C | 0.96364100  | -0.62542700 | 0.00001400  |
| C | 2.20235500  | -1.28386500 | 0.00003900  |
| C | 3.39646100  | -0.57089900 | 0.00002400  |
| C | -1.43638600 | -0.62289000 | 0.00001000  |
| C | -1.33517300 | 0.83160900  | -0.00002800 |
| C | -2.61876800 | 1.59714400  | -0.00005000 |
| C | -3.75101300 | -0.63136900 | 0.00001400  |
| H | 2.09192200  | 2.58466300  | -0.00006900 |
| H | -4.62871600 | 1.22926700  | -0.00003400 |
| N | -0.23791700 | -1.30367400 | 0.00002700  |
| N | -2.54596300 | -1.30467200 | 0.00003100  |
| N | -3.71992900 | 0.77525500  | -0.00002400 |
| N | -0.22368300 | 1.49765300  | -0.00004500 |
| O | -2.68970000 | 2.80593600  | -0.00007600 |
| O | -4.82340100 | -1.19474600 | 0.00003000  |
| C | 4.70096100  | -1.30875100 | 0.00004800  |
| H | 5.30637400  | -1.04711900 | 0.88291200  |
| H | 4.55111300  | -2.39638200 | 0.00013700  |
| H | 5.30632200  | -1.04725900 | -0.88289400 |
| C | 4.66497100  | 1.62989100  | -0.00002700 |
| H | 5.28059200  | 1.39850400  | 0.88434000  |
| H | 5.28067800  | 1.39834400  | -0.88429000 |
| H | 4.46900600  | 2.71018700  | -0.00013200 |
| H | 0.24896700  | -3.14193000 | 0.89746000  |
| C | -0.25734700 | -2.75829400 | 0.00006200  |
| H | -1.30700300 | -3.06833300 | 0.00005100  |
| H | 0.24900100  | -3.14197200 | -0.89729800 |
| H | 2.24450900  | -2.37242900 | 0.00007100  |

Sum of electronic and zero-point Energies= -870.962549  
Sum of electronic and thermal Energies= -870.946653  
Sum of electronic and thermal Enthalpies= -870.945708  
Sum of electronic and thermal Free Energies= -871.005463

**LF  $S_1$** 

|   |             |             |             |
|---|-------------|-------------|-------------|
| C | 3.38995800  | 0.83517600  | -0.00001600 |
| C | 2.17233200  | 1.50837000  | -0.00003500 |
| C | 0.92872600  | 0.84540600  | -0.00001800 |
| C | 0.96735000  | -0.59631300 | 0.00002300  |
| C | 2.19824700  | -1.27370000 | 0.00004300  |
| C | 3.40955600  | -0.59124400 | 0.00002400  |
| C | -1.41105700 | -0.55920500 | 0.00001800  |
| C | -1.35859600 | 0.86358800  | -0.00001800 |
| C | -2.62630000 | 1.57782700  | -0.00002500 |
| C | -3.75333900 | -0.64568400 | -0.00000300 |
| H | 2.13668200  | 2.59913700  | -0.00006600 |
| H | -4.65063100 | 1.18868000  | -0.00006100 |
| N | -0.23642300 | -1.27166700 | 0.00004000  |
| N | -2.51875800 | -1.29827300 | 0.00002900  |
| N | -3.74553000 | 0.72957900  | -0.00003100 |
| N | -0.20134400 | 1.56862600  | -0.00003700 |
| O | -2.77116600 | 2.78544800  | -0.00009700 |
| O | -4.78578300 | -1.29253500 | 0.00000300  |
| C | 4.70573500  | -1.34114300 | 0.00004600  |
| H | 5.31884800  | -1.09640700 | 0.88355600  |
| H | 4.53863900  | -2.42681500 | 0.00008600  |
| H | 5.31884000  | -1.09647200 | -0.88348700 |
| C | 4.67190500  | 1.60455700  | -0.00003500 |
| H | 5.28542100  | 1.35750000  | 0.88238700  |
| H | 5.28543600  | 1.35743300  | -0.88242900 |
| H | 4.49070500  | 2.68685500  | -0.00007700 |
| H | 0.25653000  | -3.10295000 | 0.89629100  |
| C | -0.25808700 | -2.72668700 | 0.00007900  |
| H | -1.30302300 | -3.04734700 | 0.00008500  |
| H | 0.25653500  | -3.10299800 | -0.89610900 |
| H | 2.21741800  | -2.36347200 | 0.00007400  |

Sum of electronic and zero-point Energies= -870.860269  
Sum of electronic and thermal Energies= -870.844696  
Sum of electronic and thermal Enthalpies= -870.843752  
Sum of electronic and thermal Free Energies= -870.902746



**LF S<sub>2</sub>**

|   |             |             |             |
|---|-------------|-------------|-------------|
| C | 3.39693900  | 0.84006400  | -0.00001200 |
| C | 2.18502300  | 1.50613400  | -0.00003100 |
| C | 0.93926900  | 0.82991700  | -0.00001500 |
| C | 0.96839600  | -0.59818100 | 0.00002500  |
| C | 2.19064400  | -1.26981900 | 0.00004200  |
| C | 3.40469800  | -0.57832100 | 0.00002500  |
| C | -1.42208400 | -0.57612200 | 0.00002200  |
| C | -1.34713700 | 0.83040500  | -0.00002600 |
| C | -2.59652900 | 1.56146600  | -0.00005900 |
| C | -3.68138900 | -0.63452500 | -0.00002000 |
| H | 2.14010700  | 2.59665400  | -0.00006100 |
| H | -4.64503300 | 1.19663900  | -0.00005800 |
| N | -0.25124800 | -1.27864100 | 0.00004600  |
| N | -2.56083400 | -1.31203800 | 0.00002400  |
| N | -3.74541700 | 0.72642000  | -0.00005800 |
| N | -0.19485300 | 1.54532800  | -0.00003900 |
| O | -2.77545800 | 2.76173300  | -0.00007600 |
| O | -4.83444700 | -1.19476900 | 0.00001700  |
| C | 4.69802900  | -1.33530400 | 0.00004500  |
| H | 5.31187100  | -1.09064100 | 0.88301400  |
| H | 4.52828800  | -2.42066200 | 0.00007100  |
| H | 5.31187300  | -1.09068400 | -0.88293400 |
| C | 4.68675800  | 1.60694400  | -0.00003200 |
| H | 5.29980900  | 1.36669900  | 0.88394800  |
| H | 5.29980200  | 1.36666400  | -0.88400700 |
| H | 4.50353300  | 2.68953800  | -0.00005300 |
| H | 0.25468800  | -3.10864300 | 0.89528000  |
| C | -0.26087200 | -2.72926600 | 0.00009400  |
| H | -1.30190200 | -3.06113900 | 0.00011800  |
| H | 0.25466200  | -3.10870400 | -0.89508200 |
| H | 2.21754100  | -2.35925600 | 0.00007000  |

Sum of electronic and zero-point Energies= -870.864040  
Sum of electronic and thermal Energies= -870.847986  
Sum of electronic and thermal Enthalpies= -870.847042  
Sum of electronic and thermal Free Energies= -870.906828

**H\*LF(O2+) S<sub>0</sub>**

|   |             |             |             |
|---|-------------|-------------|-------------|
| C | -2.53002800 | 2.45026300  | 0.00000000  |
| C | -2.44872100 | 1.07629800  | 0.00000000  |
| C | -1.20394500 | 0.40467500  | 0.00000000  |
| C | 0.00000000  | 1.17105600  | 0.00000000  |
| C | -0.07997400 | 2.56900100  | 0.00000000  |
| C | -1.31324400 | 3.20929900  | 0.00000000  |
| C | 1.22491700  | -0.86058100 | 0.00000000  |
| C | -0.03132600 | -1.54458600 | 0.00000000  |
| C | -0.02418700 | -3.03109800 | 0.00000000  |
| C | 2.39290000  | -2.79758400 | 0.00000000  |
| H | -3.34203400 | 0.44970600  | 0.00000000  |
| H | 0.82194000  | 3.17881900  | 0.00000000  |
| H | 1.37163900  | -4.57308500 | 0.00000000  |
| N | 1.20259300  | 0.49378500  | 0.00000000  |
| N | 2.41685800  | -1.48606700 | 0.00000000  |
| N | 1.28213300  | -3.55821800 | 0.00000000  |
| N | -1.19389000 | -0.93979100 | 0.00000000  |
| O | -0.98775500 | -3.74381300 | 0.00000000  |
| O | 3.51106200  | -3.48167200 | 0.00000000  |
| C | -1.37105900 | 4.70150900  | 0.00000000  |
| H | -1.91839300 | 5.07150000  | 0.88170100  |
| H | -0.37091900 | 5.15190500  | 0.00000000  |
| H | -1.91839300 | 5.07150000  | -0.88170100 |
| C | -3.85624500 | 3.14294900  | 0.00000000  |
| H | -3.96819500 | 3.79003400  | 0.88414800  |
| H | -3.96819500 | 3.79003400  | -0.88414800 |
| H | -4.68153200 | 2.42037600  | 0.00000000  |
| H | 2.50065800  | 1.87866500  | 0.89839300  |
| C | 2.45645700  | 1.24917900  | 0.00000000  |
| H | 3.28555700  | 0.53914300  | 0.00000000  |
| H | 2.50065800  | 1.87866500  | -0.89839300 |
| H | 4.25361900  | -2.85361400 | 0.00000000  |

Sum of electronic and zero-point Energies= -871.332633  
Sum of electronic and thermal Energies= -871.316667  
Sum of electronic and thermal Enthalpies= -871.315723  
Sum of electronic and thermal Free Energies= -871.375306

**H\*LF(O2+) S<sub>1</sub>**

|   |             |             |             |
|---|-------------|-------------|-------------|
| C | -2.44955800 | 2.57754500  | 0.00000000  |
| C | -2.38814500 | 1.14606900  | 0.00000000  |
| C | -1.18671000 | 0.40804300  | 0.00000000  |
| C | 0.00000000  | 1.13847000  | 0.00000000  |
| C | -0.05160500 | 2.57736200  | 0.00000000  |
| C | -1.24242800 | 3.30314000  | 0.00000000  |
| C | 1.17215600  | -0.92537900 | 0.00000000  |
| C | -0.08457300 | -1.57454400 | 0.00000000  |
| C | -0.09085900 | -3.04570000 | 0.00000000  |
| C | 2.33199400  | -2.86883400 | 0.00000000  |
| H | -3.31439500 | 0.56584700  | 0.00000000  |
| H | 0.88606800  | 3.13413200  | 0.00000000  |
| H | 1.27558000  | -4.61758100 | 0.00000000  |
| N | 1.20562800  | 0.46794600  | 0.00000000  |
| N | 2.35732100  | -1.55119300 | 0.00000000  |
| N | 1.21399400  | -3.60097400 | 0.00000000  |
| N | -1.27062500 | -0.95475500 | 0.00000000  |
| O | -1.05853600 | -3.76247400 | 0.00000000  |
| O | 3.45358000  | -3.55505600 | 0.00000000  |
| C | -1.23167500 | 4.79923800  | 0.00000000  |
| H | -1.74980100 | 5.20198100  | 0.88489000  |
| H | -0.20828200 | 5.19501800  | 0.00000000  |
| H | -1.74980100 | 5.20198100  | -0.88489000 |
| C | -3.76836400 | 3.25193900  | 0.00000000  |
| H | -3.86612900 | 3.91709000  | 0.87698600  |
| H | -3.86612900 | 3.91709000  | -0.87698600 |
| H | -4.60388800 | 2.54257600  | 0.00000000  |
| H | 2.56174700  | 1.80880700  | 0.89990100  |
| C | 2.47313700  | 1.18250000  | 0.00000000  |
| H | 3.27634700  | 0.44175300  | 0.00000000  |
| H | 2.56174700  | 1.80880700  | -0.89990100 |
| H | 4.19214100  | -2.92352300 | 0.00000000  |

Sum of electronic and zero-point Energies= -871.229954  
Sum of electronic and thermal Energies= -871.213184  
Sum of electronic and thermal Enthalpies= -871.212239  
Sum of electronic and thermal Free Energies= -871.274094

**H\*LF(O2+) S<sub>2</sub>**

|   |             |             |             |
|---|-------------|-------------|-------------|
| C | -2.48994700 | 2.55460200  | 0.00000000  |
| C | -2.46703400 | 1.16748100  | 0.00000000  |
| C | -1.25104000 | 0.46792000  | 0.00000000  |
| C | 0.00000000  | 1.18076700  | 0.00000000  |
| C | -0.05388100 | 2.56873800  | 0.00000000  |
| C | -1.26514200 | 3.26999800  | 0.00000000  |
| C | 1.20141000  | -0.91963800 | 0.00000000  |
| C | -0.03746700 | -1.60910100 | 0.00000000  |
| C | -0.06840700 | -3.07417100 | 0.00000000  |
| C | 2.35253700  | -2.88139000 | 0.00000000  |
| H | -3.38939100 | 0.58669700  | 0.00000000  |
| H | 0.87386500  | 3.14028900  | 0.00000000  |
| H | 1.29150400  | -4.63274800 | 0.00000000  |
| N | 1.19328500  | 0.44992200  | 0.00000000  |
| N | 2.37433700  | -1.57304500 | 0.00000000  |
| N | 1.22687800  | -3.61637100 | 0.00000000  |
| N | -1.11467800 | -0.84914800 | 0.00000000  |
| O | -1.05706400 | -3.76372700 | 0.00000000  |
| O | 3.46383300  | -3.58203300 | 0.00000000  |
| C | -1.25855200 | 4.76502500  | 0.00000000  |
| H | -1.78307900 | 5.16476300  | 0.88279400  |
| H | -0.23791400 | 5.16792100  | 0.00000000  |
| H | -1.78307900 | 5.16476300  | -0.88279400 |
| C | -3.79798300 | 3.28201300  | 0.00000000  |
| H | -3.88815100 | 3.93286700  | 0.88392700  |
| H | -3.88815100 | 3.93286700  | -0.88392700 |
| H | -4.64658700 | 2.58689400  | 0.00000000  |
| H | 2.51749900  | 1.81281700  | 0.89821500  |
| C | 2.45423200  | 1.18205600  | 0.00000000  |
| H | 3.27316900  | 0.45919000  | 0.00000000  |
| H | 2.51749900  | 1.81281700  | -0.89821500 |
| H | 4.21755700  | -2.96836900 | 0.00000000  |

Sum of electronic and zero-point Energies= -871.224636  
Sum of electronic and thermal Energies= -871.208110  
Sum of electronic and thermal Enthalpies= -871.207166  
Sum of electronic and thermal Free Energies= -871.267987

**H\*LF(N1) S<sub>0</sub>**

|   |             |             |             |
|---|-------------|-------------|-------------|
| C | -3.43333700 | 0.84615600  | 0.02885800  |
| C | -2.21484200 | 1.48905400  | 0.05360100  |
| C | -0.99654800 | 0.77430900  | 0.04377900  |
| C | -1.02571200 | -0.64960100 | 0.02432700  |
| C | -2.25856400 | -1.30602500 | -0.01637800 |
| C | -3.44898000 | -0.58398000 | -0.01650500 |
| C | 1.34026700  | -0.61396000 | -0.02035000 |
| C | 1.28513900  | 0.81096800  | 0.00409200  |
| C | 2.55965400  | 1.59517500  | -0.00986400 |
| C | 3.79024000  | -0.56277200 | -0.12584200 |
| H | -2.14166100 | 2.57756300  | 0.07588300  |
| H | -2.32017100 | -2.39167100 | -0.07262800 |
| H | 4.59711700  | 1.29961600  | -0.08085400 |
| N | 0.19538400  | -1.31814200 | 0.04103500  |
| N | 2.53882100  | -1.22753000 | -0.09215400 |
| N | 3.70680300  | 0.80520700  | -0.06407000 |
| N | 0.15832000  | 1.46902400  | 0.04792300  |
| O | 2.60375500  | 2.79331300  | 0.02438700  |
| O | 4.80377600  | -1.19894400 | -0.20349400 |
| C | -4.75204900 | -1.31121000 | -0.06998900 |
| H | -5.33454900 | -1.00494100 | -0.95354100 |
| H | -4.61664000 | -2.39913900 | -0.10547400 |
| H | -5.37093800 | -1.06729400 | 0.80830200  |
| C | -4.71312500 | 1.62092100  | 0.03875700  |
| H | -5.31484400 | 1.40828400  | -0.85879000 |
| H | -5.33327300 | 1.35371400  | 0.90875600  |
| H | -4.52370400 | 2.70071400  | 0.07410100  |
| H | 0.27366200  | -3.22569300 | -0.88230500 |
| C | 0.23978200  | -2.77885100 | 0.12206900  |
| H | 1.11149800  | -3.08892400 | 0.71096200  |
| H | -0.64624200 | -3.13506100 | 0.65419300  |
| H | 2.63338900  | -2.23358200 | -0.18440500 |

Sum of electronic and zero-point Energies= -871.326940  
Sum of electronic and thermal Energies= -871.310683  
Sum of electronic and thermal Enthalpies= -871.309738  
Sum of electronic and thermal Free Energies= -871.370320

**H\*LF(N1) S<sub>1</sub>**

|   |             |             |             |
|---|-------------|-------------|-------------|
| C | -3.45066500 | 0.82287700  | -0.02051500 |
| C | -2.18013800 | 1.48370800  | 0.06488600  |
| C | -0.93835500 | 0.81152500  | 0.07993300  |
| C | -0.98519900 | -0.57649500 | 0.05761600  |
| C | -2.25383200 | -1.25052700 | -0.06386900 |
| C | -3.47602400 | -0.58542200 | -0.08983300 |
| C | 1.37323200  | -0.54719400 | 0.03316700  |
| C | 1.33128300  | 0.85340200  | 0.06470000  |
| C | 2.61430300  | 1.59865800  | 0.01970300  |
| C | 3.81350500  | -0.57734800 | -0.14239900 |
| H | -2.14256100 | 2.57401700  | 0.13399100  |
| H | -2.26333300 | -2.33678200 | -0.16545400 |
| H | 4.64548500  | 1.27300400  | -0.10720600 |
| N | 0.20551700  | -1.28769300 | 0.13221300  |
| N | 2.54946600  | -1.20330200 | -0.07508300 |
| N | 3.75192400  | 0.78757100  | -0.06866800 |
| N | 0.20099800  | 1.56684200  | 0.13166900  |
| O | 2.69726500  | 2.79888300  | 0.05914400  |
| O | 4.81326100  | -1.23792700 | -0.25118000 |
| C | -4.76361600 | -1.33820600 | -0.20912800 |
| H | -5.32102900 | -1.03623300 | -1.10989400 |
| H | -4.59382800 | -2.42078300 | -0.26539500 |
| H | -5.41961600 | -1.14452600 | 0.65442300  |
| C | -4.68979400 | 1.63039300  | -0.04960000 |
| H | -5.26380300 | 1.42952900  | -0.97298800 |
| H | -5.36586700 | 1.33450600  | 0.77335300  |
| H | -4.49547500 | 2.70675900  | 0.01814900  |
| H | 0.26210400  | -3.29182900 | -0.58967000 |
| C | 0.24237900  | -2.72492300 | 0.35523500  |
| H | 1.12311800  | -2.98105300 | 0.95867100  |
| H | -0.63075500 | -3.02968300 | 0.94296700  |
| H | 2.60354300  | -2.21117700 | -0.17495100 |

Sum of electronic and zero-point Energies= -871.222032  
Sum of electronic and thermal Energies= -871.204993  
Sum of electronic and thermal Enthalpies= -871.204048  
Sum of electronic and thermal Free Energies= -871.266664

**H\*LF(N1) S<sub>2</sub>**

|   |             |             |             |
|---|-------------|-------------|-------------|
| C | 3.42299800  | 0.83622000  | 0.00373800  |
| C | 2.21235400  | 1.50210100  | -0.05771500 |
| C | 0.97145100  | 0.82558600  | -0.06420900 |
| C | 0.99129100  | -0.60576700 | -0.03179700 |
| C | 2.20430500  | -1.27621900 | 0.04880900  |
| C | 3.42099800  | -0.58345400 | 0.06946900  |
| C | -1.38088800 | -0.57279500 | -0.03173200 |
| C | -1.30289800 | 0.81334000  | -0.03699700 |
| C | -2.54663300 | 1.52330400  | 0.00088100  |
| C | -3.81185600 | -0.56125900 | 0.08184500  |
| H | 2.17043800  | 2.59165800  | -0.09423500 |
| H | 2.23817300  | -2.36352300 | 0.11045000  |
| H | -4.59468300 | 1.34929200  | 0.07439000  |
| N | -0.24061800 | -1.29855500 | -0.09123500 |
| N | -2.60091000 | -1.20530200 | 0.03287400  |
| N | -3.70692800 | 0.84894900  | 0.04255000  |
| N | -0.16320900 | 1.54916000  | -0.08864100 |
| O | -2.60917200 | 2.78487400  | -0.01158300 |
| O | -4.88084600 | -1.09522300 | 0.15426600  |
| C | 4.70610300  | -1.34057800 | 0.16133200  |
| H | 5.27921500  | -1.04274000 | 1.05428000  |
| H | 4.54060200  | -2.42442800 | 0.20841900  |
| H | 5.35305800  | -1.13058200 | -0.70586400 |
| C | 4.71298100  | 1.59646300  | 0.01119400  |
| H | 5.29254900  | 1.39002800  | 0.92477800  |
| H | 5.34983700  | 1.30885000  | -0.84018500 |
| H | 4.53905900  | 2.67823400  | -0.04424700 |
| H | -0.08926400 | -3.24102000 | 0.75167500  |
| C | -0.24662100 | -2.74711700 | -0.21940900 |
| H | -1.18344500 | -3.09459500 | -0.66992400 |
| H | 0.55390100  | -3.04344300 | -0.90795400 |
| H | -2.66914100 | -2.21365400 | 0.11566400  |

Sum of electronic and zero-point Energies= -871.224478  
Sum of electronic and thermal Energies= -871.208060  
Sum of electronic and thermal Enthalpies= -871.207116  
Sum of electronic and thermal Free Energies= -871.267734

**H\*LF(O2-) S<sub>0</sub>**

|   |             |             |             |
|---|-------------|-------------|-------------|
| C | -2.52707400 | 2.45957700  | 0.00000000  |
| C | -2.45018700 | 1.08569500  | 0.00000000  |
| C | -1.20737900 | 0.40959200  | 0.00000000  |
| C | 0.00000000  | 1.17267300  | 0.00000000  |
| C | -0.07643100 | 2.57108200  | 0.00000000  |
| C | -1.30746200 | 3.21496000  | 0.00000000  |
| C | 1.21902600  | -0.86208100 | 0.00000000  |
| C | -0.03937600 | -1.54025300 | 0.00000000  |
| C | -0.02714200 | -3.02222900 | 0.00000000  |
| C | 2.40722200  | -2.78724100 | 0.00000000  |
| H | -3.34562600 | 0.46215800  | 0.00000000  |
| H | 0.82800900  | 3.17710500  | 0.00000000  |
| H | 1.32851100  | -4.56606600 | 0.00000000  |
| N | 1.20001600  | 0.49386400  | 0.00000000  |
| N | 2.40987200  | -1.48013100 | 0.00000000  |
| N | 1.28625900  | -3.54857000 | 0.00000000  |
| N | -1.20225400 | -0.93448200 | 0.00000000  |
| O | -0.98090900 | -3.74852700 | 0.00000000  |
| O | 3.58672600  | -3.36693900 | 0.00000000  |
| C | -1.36073200 | 4.70727600  | 0.00000000  |
| H | -1.90692500 | 5.07892500  | 0.88172300  |
| H | -0.35916000 | 5.15442000  | 0.00000000  |
| H | -1.90692500 | 5.07892500  | -0.88172300 |
| C | -3.85095000 | 3.15675200  | 0.00000000  |
| H | -3.96076300 | 3.80424100  | 0.88412400  |
| H | -3.96076300 | 3.80424100  | -0.88412400 |
| H | -4.67867200 | 2.43694500  | 0.00000000  |
| H | 2.50642500  | 1.87074500  | 0.89865600  |
| C | 2.45935100  | 1.24185200  | 0.00000000  |
| H | 3.28300800  | 0.52432400  | 0.00000000  |
| H | 2.50642500  | 1.87074500  | -0.89865600 |
| H | 3.52946900  | -4.33368900 | 0.00000000  |

Sum of electronic and zero-point Energies= -871.322692  
Sum of electronic and thermal Energies= -871.306578  
Sum of electronic and thermal Enthalpies= -871.305634  
Sum of electronic and thermal Free Energies= -871.365446

**H\*LF(O2-) S<sub>1</sub>**

|   |             |             |             |
|---|-------------|-------------|-------------|
| C | -2.44468300 | 2.58742400  | 0.00000000  |
| C | -2.38877300 | 1.15610500  | 0.00000000  |
| C | -1.19076400 | 0.41416200  | 0.00000000  |
| C | 0.00000000  | 1.14081000  | 0.00000000  |
| C | -0.04633300 | 2.57920200  | 0.00000000  |
| C | -1.23501700 | 3.30878000  | 0.00000000  |
| C | 1.16611400  | -0.92614800 | 0.00000000  |
| C | -0.09429300 | -1.57097200 | 0.00000000  |
| C | -0.09547400 | -3.03674100 | 0.00000000  |
| C | 2.34430400  | -2.85931900 | 0.00000000  |
| H | -3.31729500 | 0.57961900  | 0.00000000  |
| H | 0.89375100  | 3.13185500  | 0.00000000  |
| H | 1.23408900  | -4.60936100 | 0.00000000  |
| N | 1.20235900  | 0.46695900  | 0.00000000  |
| N | 2.34940900  | -1.54432800 | 0.00000000  |
| N | 1.21826500  | -3.59120500 | 0.00000000  |
| N | -1.27906700 | -0.94832400 | 0.00000000  |
| O | -1.05204200 | -3.76936100 | 0.00000000  |
| O | 3.52700600  | -3.44051600 | 0.00000000  |
| C | -1.21909500 | 4.80482000  | 0.00000000  |
| H | -1.73585000 | 5.20937400  | 0.88487800  |
| H | -0.19430400 | 5.19694200  | 0.00000000  |
| H | -1.73585000 | 5.20937400  | -0.88487800 |
| C | -3.76102700 | 3.26724700  | 0.00000000  |
| H | -3.85644500 | 3.93243900  | 0.87712200  |
| H | -3.85644500 | 3.93243900  | -0.87712200 |
| H | -4.59918000 | 2.56094300  | 0.00000000  |
| H | 2.56617600  | 1.79932400  | 0.90015900  |
| C | 2.47560100  | 1.17389800  | 0.00000000  |
| H | 3.27321600  | 0.42599200  | 0.00000000  |
| H | 2.56617600  | 1.79932400  | -0.90015900 |
| H | 3.46212600  | -4.40655800 | 0.00000000  |

Sum of electronic and zero-point Energies= -871.220900  
Sum of electronic and thermal Energies= -871.204018  
Sum of electronic and thermal Enthalpies= -871.203074  
Sum of electronic and thermal Free Energies= -871.265043

**H\*LF(O2-) S<sub>2</sub>**

|   |             |             |             |
|---|-------------|-------------|-------------|
| C | -2.48625500 | 2.56284500  | 0.00000000  |
| C | -2.46671800 | 1.17592500  | 0.00000000  |
| C | -1.25244900 | 0.47264700  | 0.00000000  |
| C | 0.00000000  | 1.18313000  | 0.00000000  |
| C | -0.05010400 | 2.57151400  | 0.00000000  |
| C | -1.25943600 | 3.27541700  | 0.00000000  |
| C | 1.19549700  | -0.91828300 | 0.00000000  |
| C | -0.04690800 | -1.60675300 | 0.00000000  |
| C | -0.07198700 | -3.06457100 | 0.00000000  |
| C | 2.36560900  | -2.87449700 | 0.00000000  |
| H | -3.39065900 | 0.59765200  | 0.00000000  |
| H | 0.87946600  | 3.14000100  | 0.00000000  |
| H | 1.24926400  | -4.62616900 | 0.00000000  |
| N | 1.19075900  | 0.45034200  | 0.00000000  |
| N | 2.36313300  | -1.56835200 | 0.00000000  |
| N | 1.23196400  | -3.60848300 | 0.00000000  |
| N | -1.12413700 | -0.84570100 | 0.00000000  |
| O | -1.05079800 | -3.76954300 | 0.00000000  |
| O | 3.54465500  | -3.45987400 | 0.00000000  |
| C | -1.24936700 | 4.77041700  | 0.00000000  |
| H | -1.77296300 | 5.17137800  | 0.88279800  |
| H | -0.22774600 | 5.17077500  | 0.00000000  |
| H | -1.77296300 | 5.17137800  | -0.88279800 |
| C | -3.79241500 | 3.29367900  | 0.00000000  |
| H | -3.88098700 | 3.94477800  | 0.88391300  |
| H | -3.88098700 | 3.94477800  | -0.88391300 |
| H | -4.64278900 | 2.60069500  | 0.00000000  |
| H | 2.52363600  | 1.80468900  | 0.89847600  |
| C | 2.45744000  | 1.17479800  | 0.00000000  |
| H | 3.27082400  | 0.44445800  | 0.00000000  |
| H | 2.52363600  | 1.80468900  | -0.89847600 |
| H | 3.48192500  | -4.42601900 | 0.00000000  |

Sum of electronic and zero-point Energies= -871.215308  
Sum of electronic and thermal Energies= -871.198607  
Sum of electronic and thermal Enthalpies= -871.197663  
Sum of electronic and thermal Free Energies= -871.258749

**H\*LF(O4+) S<sub>0</sub>**

|   |             |             |             |
|---|-------------|-------------|-------------|
| C | -2.60737800 | 2.31395100  | 0.00000000  |
| C | -2.45524500 | 0.94817700  | 0.00000000  |
| C | -1.17657000 | 0.33949500  | 0.00000000  |
| C | 0.00000000  | 1.16085100  | 0.00000000  |
| C | -0.16178900 | 2.55149800  | 0.00000000  |
| C | -1.42624300 | 3.12987800  | 0.00000000  |
| C | 1.36491700  | -0.80206200 | 0.00000000  |
| C | 0.11993700  | -1.51993400 | 0.00000000  |
| C | 0.21527100  | -2.95394500 | 0.00000000  |
| C | 2.66348700  | -2.71468200 | 0.00000000  |
| H | -3.32017500 | 0.28280500  | 0.00000000  |
| H | 0.70859500  | 3.20518300  | 0.00000000  |
| H | 1.52735500  | -4.50243200 | 0.00000000  |
| N | 1.24090300  | 0.56718700  | 0.00000000  |
| N | 2.54686900  | -1.35680600 | 0.00000000  |
| N | 1.41124200  | -3.48823900 | 0.00000000  |
| N | -1.08537000 | -1.00096700 | 0.00000000  |
| O | -0.84787700 | -3.69684000 | 0.00000000  |
| O | 3.67587500  | -3.35465400 | 0.00000000  |
| C | -1.55561200 | 4.61626500  | 0.00000000  |
| H | -2.12168200 | 4.95827300  | 0.88140600  |
| H | -0.57893700 | 5.11496400  | 0.00000000  |
| H | -2.12168200 | 4.95827300  | -0.88140600 |
| C | -3.96557100 | 2.94180400  | 0.00000000  |
| H | -4.10955400 | 3.58239000  | 0.88416300  |
| H | -4.10955400 | 3.58239000  | -0.88416300 |
| H | -4.75549900 | 2.18051600  | 0.00000000  |
| H | 2.47566600  | 2.01254100  | 0.89951100  |
| C | 2.45474200  | 1.38264000  | 0.00000000  |
| H | 3.31097700  | 0.70194600  | 0.00000000  |
| H | 2.47566600  | 2.01254100  | -0.89951100 |
| H | -1.62034300 | -3.08926900 | 0.00000000  |

Sum of electronic and zero-point Energies= -871.319077  
Sum of electronic and thermal Energies= -871.303116  
Sum of electronic and thermal Enthalpies= -871.302172  
Sum of electronic and thermal Free Energies= -871.361722

**H\*LF(O4+) S<sub>1</sub>**

|   |             |             |             |
|---|-------------|-------------|-------------|
| C | -2.52086800 | 2.42697000  | 0.00000000  |
| C | -2.40812600 | 1.01810800  | 0.00000000  |
| C | -1.18196100 | 0.35099100  | 0.00000000  |
| C | 0.00000000  | 1.14497200  | 0.00000000  |
| C | -0.10957900 | 2.55385100  | 0.00000000  |
| C | -1.34095800 | 3.20936100  | 0.00000000  |
| C | 1.29735200  | -0.84187300 | 0.00000000  |
| C | 0.05422300  | -1.55904200 | 0.00000000  |
| C | 0.15460300  | -2.96339600 | 0.00000000  |
| C | 2.56659000  | -2.80359700 | 0.00000000  |
| H | -3.30918100 | 0.40159600  | 0.00000000  |
| H | 0.79535100  | 3.16098900  | 0.00000000  |
| H | 1.44549500  | -4.56142500 | 0.00000000  |
| N | 1.23716400  | 0.52410100  | 0.00000000  |
| N | 2.47905100  | -1.42056400 | 0.00000000  |
| N | 1.36127000  | -3.54754500 | 0.00000000  |
| N | -1.16685100 | -1.01203400 | 0.00000000  |
| O | -0.90888700 | -3.72204500 | 0.00000000  |
| O | 3.62152300  | -3.38665300 | 0.00000000  |
| C | -1.40693200 | 4.70335800  | 0.00000000  |
| H | -1.94707500 | 5.07867200  | 0.88393900  |
| H | -0.40579400 | 5.15248200  | 0.00000000  |
| H | -1.94707500 | 5.07867200  | -0.88393900 |
| C | -3.86474700 | 3.06347300  | 0.00000000  |
| H | -3.98905200 | 3.71830100  | 0.87956600  |
| H | -3.98905200 | 3.71830100  | -0.87956600 |
| H | -4.67341700 | 2.32302600  | 0.00000000  |
| H | 2.51451500  | 1.93237800  | 0.89964000  |
| C | 2.47394400  | 1.30310800  | 0.00000000  |
| H | 3.31290200  | 0.60196600  | 0.00000000  |
| H | 2.51451500  | 1.93237800  | -0.89964000 |
| H | -1.67890800 | -3.11317700 | 0.00000000  |

Sum of electronic and zero-point Energies= -871.238512  
Sum of electronic and thermal Energies= -871.222084  
Sum of electronic and thermal Enthalpies= -871.221140  
Sum of electronic and thermal Free Energies= -871.281755

**H\*LF(O4+) S<sub>2</sub>**

|   |             |             |             |
|---|-------------|-------------|-------------|
| C | -2.51916700 | 2.45275500  | 0.00000000  |
| C | -2.43123400 | 1.07152400  | 0.00000000  |
| C | -1.19058700 | 0.40031800  | 0.00000000  |
| C | 0.00000000  | 1.18549500  | 0.00000000  |
| C | -0.08408800 | 2.56986700  | 0.00000000  |
| C | -1.32333100 | 3.22068300  | 0.00000000  |
| C | 1.27918800  | -0.81456800 | 0.00000000  |
| C | 0.04393900  | -1.56314000 | 0.00000000  |
| C | 0.14429100  | -2.95709000 | 0.00000000  |
| C | 2.58506300  | -2.89952800 | 0.00000000  |
| H | -3.33101400 | 0.45476100  | 0.00000000  |
| H | 0.81760400  | 3.18119700  | 0.00000000  |
| H | 1.40116400  | -4.58678100 | 0.00000000  |
| N | 1.24528300  | 0.51313500  | 0.00000000  |
| N | 2.38002000  | -1.53146400 | 0.00000000  |
| N | 1.34757900  | -3.56983300 | 0.00000000  |
| N | -1.14090200 | -0.94476700 | 0.00000000  |
| O | -0.91368700 | -3.73008800 | 0.00000000  |
| O | 3.64103600  | -3.45726100 | 0.00000000  |
| C | -1.37988200 | 4.71402800  | 0.00000000  |
| H | -1.92249100 | 5.09051500  | 0.88221900  |
| H | -0.37786500 | 5.16127600  | 0.00000000  |
| H | -1.92249100 | 5.09051500  | -0.88221900 |
| C | -3.85528000 | 3.12840400  | 0.00000000  |
| H | -3.97384400 | 3.77477100  | 0.88382000  |
| H | -3.97384400 | 3.77477100  | -0.88382000 |
| H | -4.67405700 | 2.39818200  | 0.00000000  |
| H | 2.54907800  | 1.89920200  | 0.89875500  |
| C | 2.49479900  | 1.27046000  | 0.00000000  |
| H | 3.33437400  | 0.56527600  | 0.00000000  |
| H | 2.54907800  | 1.89920200  | -0.89875500 |
| H | -1.70060700 | -3.14884300 | 0.00000000  |

Sum of electronic and zero-point Energies= -871.217562  
Sum of electronic and thermal Energies= -871.201359  
Sum of electronic and thermal Enthalpies= -871.200415  
Sum of electronic and thermal Free Energies= -871.260296

**H\*LF(N5) S<sub>0</sub>**

|   |             |             |             |
|---|-------------|-------------|-------------|
| C | -2.60490600 | 2.32358600  | 0.00000000  |
| C | -2.45868900 | 0.95216400  | 0.00000000  |
| C | -1.18185800 | 0.36945300  | 0.00000000  |
| C | 0.00000000  | 1.15995500  | 0.00000000  |
| C | -0.16280300 | 2.55180600  | 0.00000000  |
| C | -1.42454100 | 3.13569400  | 0.00000000  |
| C | 1.37621600  | -0.82347000 | 0.00000000  |
| C | 0.15080900  | -1.56821600 | 0.00000000  |
| C | 0.16529200  | -3.05077300 | 0.00000000  |
| C | 2.63559800  | -2.77263200 | 0.00000000  |
| H | -3.33596500 | 0.30117000  | 0.00000000  |
| H | 0.71170700  | 3.19969900  | 0.00000000  |
| H | 1.55737300  | -4.54681300 | 0.00000000  |
| N | 1.23843800  | 0.55482000  | 0.00000000  |
| N | 2.54062300  | -1.38731800 | 0.00000000  |
| N | 1.42839300  | -3.53615800 | 0.00000000  |
| N | -1.01657700 | -0.98527300 | 0.00000000  |
| O | -0.88154800 | -3.66824600 | 0.00000000  |
| O | 3.68221500  | -3.36020100 | 0.00000000  |
| C | -1.54971200 | 4.62322500  | 0.00000000  |
| H | -2.11258700 | 4.96824500  | 0.88208900  |
| H | -0.57071400 | 5.11729100  | 0.00000000  |
| H | -2.11258700 | 4.96824500  | -0.88208900 |
| C | -3.96241100 | 2.95021600  | 0.00000000  |
| H | -4.10328700 | 3.59185800  | 0.88389500  |
| H | -4.10328700 | 3.59185800  | -0.88389500 |
| H | -4.75547100 | 2.19220500  | 0.00000000  |
| H | 2.48134300  | 1.99414500  | 0.90011500  |
| C | 2.45520700  | 1.36459200  | 0.00000000  |
| H | 3.30719400  | 0.67773400  | 0.00000000  |
| H | 2.48134300  | 1.99414500  | -0.90011500 |
| H | -1.81574100 | -1.63831400 | 0.00000000  |

Sum of electronic and zero-point Energies= -871.312878  
Sum of electronic and thermal Energies= -871.296823  
Sum of electronic and thermal Enthalpies= -871.295879  
Sum of electronic and thermal Free Energies= -871.355815

**H\*LF(N5) S<sub>1</sub>**

|   |             |             |             |
|---|-------------|-------------|-------------|
| C | -2.51077800 | 2.44762900  | 0.00000000  |
| C | -2.42293000 | 1.04124100  | 0.00000000  |
| C | -1.20171500 | 0.38290300  | 0.00000000  |
| C | 0.00000000  | 1.13727200  | 0.00000000  |
| C | -0.09582000 | 2.54402100  | 0.00000000  |
| C | -1.31866900 | 3.21142300  | 0.00000000  |
| C | 1.28480800  | -0.87075900 | 0.00000000  |
| C | 0.06950000  | -1.61882200 | 0.00000000  |
| C | 0.09011700  | -3.06553400 | 0.00000000  |
| C | 2.55043000  | -2.85313900 | 0.00000000  |
| H | -3.34097800 | 0.44921000  | 0.00000000  |
| H | 0.81598900  | 3.13977300  | 0.00000000  |
| H | 1.46605900  | -4.59938400 | 0.00000000  |
| N | 1.22977100  | 0.49418300  | 0.00000000  |
| N | 2.46785400  | -1.44580300 | 0.00000000  |
| N | 1.36852100  | -3.58686300 | 0.00000000  |
| N | -1.12403400 | -0.98840100 | 0.00000000  |
| O | -0.93291800 | -3.72704300 | 0.00000000  |
| O | 3.63233200  | -3.38673900 | 0.00000000  |
| C | -1.36629400 | 4.70655900  | 0.00000000  |
| H | -1.90173500 | 5.08745400  | 0.88413500  |
| H | -0.35978400 | 5.14323700  | 0.00000000  |
| H | -1.90173500 | 5.08745400  | -0.88413500 |
| C | -3.84496100 | 3.10697000  | 0.00000000  |
| H | -3.95773700 | 3.76188000  | 0.88038100  |
| H | -3.95773700 | 3.76188000  | -0.88038100 |
| H | -4.66676200 | 2.38094600  | 0.00000000  |
| H | 2.51203100  | 1.89624100  | 0.90011100  |
| C | 2.47170000  | 1.26756000  | 0.00000000  |
| H | 3.30621600  | 0.56100000  | 0.00000000  |
| H | 2.51203100  | 1.89624100  | -0.90011100 |
| H | -1.94829900 | -1.59141900 | 0.00000000  |

Sum of electronic and zero-point Energies= -871.241701  
Sum of electronic and thermal Energies= -871.225913  
Sum of electronic and thermal Enthalpies= -871.224968  
Sum of electronic and thermal Free Energies= -871.284244

**H\*LF(N5) S<sub>2</sub>**

|   |             |             |             |
|---|-------------|-------------|-------------|
| C | -2.52838300 | 2.42852000  | 0.00000000  |
| C | -2.44759800 | 1.04742900  | 0.00000000  |
| C | -1.20811700 | 0.39201000  | 0.00000000  |
| C | 0.00000000  | 1.14312200  | 0.00000000  |
| C | -0.09226400 | 2.53808600  | 0.00000000  |
| C | -1.32137800 | 3.19025500  | 0.00000000  |
| C | 1.29215600  | -0.87914700 | 0.00000000  |
| C | 0.08155800  | -1.60074800 | 0.00000000  |
| C | 0.10008100  | -3.04164200 | 0.00000000  |
| C | 2.51126600  | -2.78486500 | 0.00000000  |
| H | -3.35823800 | 0.44450300  | 0.00000000  |
| H | 0.81339800  | 3.14162800  | 0.00000000  |
| H | 1.48257200  | -4.58748400 | 0.00000000  |
| N | 1.22785100  | 0.48276900  | 0.00000000  |
| N | 2.49182900  | -1.45798200 | 0.00000000  |
| N | 1.39694200  | -3.57354800 | 0.00000000  |
| N | -1.11822700 | -0.96275800 | 0.00000000  |
| O | -0.88347400 | -3.75007100 | 0.00000000  |
| O | 3.61330800  | -3.41248300 | 0.00000000  |
| C | -1.37473900 | 4.68352800  | 0.00000000  |
| H | -1.91624000 | 5.05997300  | 0.88264100  |
| H | -0.37131800 | 5.12684600  | 0.00000000  |
| H | -1.91624000 | 5.05997300  | -0.88264100 |
| C | -3.85815100 | 3.11130000  | 0.00000000  |
| H | -3.96960700 | 3.75977500  | 0.88331600  |
| H | -3.96960700 | 3.75977500  | -0.88331600 |
| H | -4.68388200 | 2.38909300  | 0.00000000  |
| H | 2.50068000  | 1.89201100  | 0.89879200  |
| C | 2.46369600  | 1.26099400  | 0.00000000  |
| H | 3.30246900  | 0.56068200  | 0.00000000  |
| H | 2.50068000  | 1.89201100  | -0.89879200 |
| H | -1.95087200 | -1.55078000 | 0.00000000  |

Sum of electronic and zero-point Energies= -871.245759  
Sum of electronic and thermal Energies= -871.229554  
Sum of electronic and thermal Enthalpies= -871.228610  
Sum of electronic and thermal Free Energies= -871.288633



**H\*LF(OH++) S<sub>0</sub>**

|   |             |             |             |
|---|-------------|-------------|-------------|
| C | -2.58116400 | 2.34865400  | 0.00000000  |
| C | -2.45213900 | 0.98027500  | 0.00000000  |
| C | -1.18422500 | 0.35005800  | 0.00000000  |
| C | 0.00000000  | 1.15843800  | 0.00000000  |
| C | -0.13532300 | 2.55324300  | 0.00000000  |
| C | -1.38874800 | 3.15016400  | 0.00000000  |
| C | 1.30951000  | -0.81976800 | 0.00000000  |
| C | 0.07767500  | -1.53927500 | 0.00000000  |
| C | 0.20131600  | -2.98687000 | 0.00000000  |
| C | 2.43717300  | -2.76938400 | 0.00000000  |
| H | -3.32706700 | 0.32831200  | 0.00000000  |
| H | 0.74548600  | 3.19305500  | 0.00000000  |
| N | 1.22889700  | 0.53859100  | 0.00000000  |
| N | 2.48778900  | -1.43171500 | 0.00000000  |
| N | 1.36141200  | -3.57998400 | 0.00000000  |
| N | -1.11730900 | -0.99187000 | 0.00000000  |
| O | -0.88643200 | -3.71072100 | 0.00000000  |
| O | 3.57893700  | -3.40979600 | 0.00000000  |
| C | -1.49847000 | 4.63858400  | 0.00000000  |
| H | -2.05905200 | 4.98867100  | 0.88159800  |
| H | -0.51489600 | 5.12373900  | 0.00000000  |
| H | -2.05905200 | 4.98867100  | -0.88159800 |
| C | -3.92951700 | 2.99636300  | 0.00000000  |
| H | -4.06265500 | 3.63942600  | 0.88408500  |
| H | -4.06265500 | 3.63942600  | -0.88408500 |
| H | -4.73087700 | 2.24731300  | 0.00000000  |
| H | 2.48682200  | 1.96215700  | 0.89910100  |
| C | 2.45773500  | 1.33256000  | 0.00000000  |
| H | 3.30393500  | 0.64127500  | 0.00000000  |
| H | 2.48682200  | 1.96215700  | -0.89910100 |
| H | 4.29473600  | -2.75240300 | 0.00000000  |
| H | -1.65006400 | -3.10107100 | 0.00000000  |

Sum of electronic and zero-point Energies= -871.322326  
Sum of electronic and thermal Energies= -871.306536  
Sum of electronic and thermal Enthalpies= -871.305592  
Sum of electronic and thermal Free Energies= -871.364672

**H\*LF(OH++) S<sub>1</sub>**

|   |             |             |             |
|---|-------------|-------------|-------------|
| C | -2.50601100 | 2.47214600  | 0.00000000  |
| C | -2.39489400 | 1.04728100  | 0.00000000  |
| C | -1.17081200 | 0.35463400  | 0.00000000  |
| C | 0.00000000  | 1.12646300  | 0.00000000  |
| C | -0.10652500 | 2.55778000  | 0.00000000  |
| C | -1.32470600 | 3.23888400  | 0.00000000  |
| C | 1.26434900  | -0.87710500 | 0.00000000  |
| C | 0.02607200  | -1.57286300 | 0.00000000  |
| C | 0.13965900  | -2.99995100 | 0.00000000  |
| C | 2.37213900  | -2.85197300 | 0.00000000  |
| H | -3.30341900 | 0.44028400  | 0.00000000  |
| H | 0.80970400  | 3.14899100  | 0.00000000  |
| N | 1.23211100  | 0.51103300  | 0.00000000  |
| N | 2.42844400  | -1.49419200 | 0.00000000  |
| N | 1.30098900  | -3.63061900 | 0.00000000  |
| N | -1.19058200 | -1.01178300 | 0.00000000  |
| O | -0.95734300 | -3.71852900 | 0.00000000  |
| O | 3.52870300  | -3.47595500 | 0.00000000  |
| C | -1.36698100 | 4.73400000  | 0.00000000  |
| H | -1.90010400 | 5.11724100  | 0.88467800  |
| H | -0.35876200 | 5.16676800  | 0.00000000  |
| H | -1.90010400 | 5.11724100  | -0.88467800 |
| C | -3.84738800 | 3.10344700  | 0.00000000  |
| H | -3.96823800 | 3.76345900  | 0.87758100  |
| H | -3.96823800 | 3.76345900  | -0.87758100 |
| H | -4.65879800 | 2.36643500  | 0.00000000  |
| H | 2.54411400  | 1.89552800  | 0.90049300  |
| C | 2.47645600  | 1.26825900  | 0.00000000  |
| H | 3.29971200  | 0.54848100  | 0.00000000  |
| H | 2.54411400  | 1.89552800  | -0.90049300 |
| H | 4.23039100  | -2.80499800 | 0.00000000  |
| H | -1.70614100 | -3.08963300 | 0.00000000  |

Sum of electronic and zero-point Energies= -871.227728  
Sum of electronic and thermal Energies= -871.211247  
Sum of electronic and thermal Enthalpies= -871.210303  
Sum of electronic and thermal Free Energies= -871.271218

**H\*LF(OH++) S<sub>2</sub>**

|   |             |             |             |
|---|-------------|-------------|-------------|
| C | -2.51232300 | 2.45678400  | 0.00000000  |
| C | -2.43809100 | 1.07438700  | 0.00000000  |
| C | -1.20946300 | 0.38727500  | 0.00000000  |
| C | 0.00000000  | 1.15543500  | 0.00000000  |
| C | -0.07566600 | 2.54454900  | 0.00000000  |
| C | -1.30556600 | 3.20868300  | 0.00000000  |
| C | 1.24549400  | -0.86715000 | 0.00000000  |
| C | 0.00926700  | -1.53993700 | 0.00000000  |
| C | 0.10403800  | -2.96507800 | 0.00000000  |
| C | 2.44543600  | -2.87903400 | 0.00000000  |
| H | -3.34415500 | 0.46666900  | 0.00000000  |
| H | 0.83208600  | 3.14651100  | 0.00000000  |
| N | 1.23716800  | 0.48711200  | 0.00000000  |
| N | 2.39485500  | -1.56307800 | 0.00000000  |
| N | 1.29471700  | -3.53506000 | 0.00000000  |
| N | -1.19011100 | -0.96748000 | 0.00000000  |
| O | -0.96971200 | -3.70158400 | 0.00000000  |
| O | 3.55619200  | -3.56949600 | 0.00000000  |
| C | -1.34460600 | 4.70280000  | 0.00000000  |
| H | -1.88291000 | 5.08542500  | 0.88218300  |
| H | -0.33726000 | 5.13794800  | 0.00000000  |
| H | -1.88291000 | 5.08542500  | -0.88218300 |
| C | -3.83977500 | 3.14845700  | 0.00000000  |
| H | -3.95137400 | 3.79648900  | 0.88367200  |
| H | -3.95137400 | 3.79648900  | -0.88367200 |
| H | -4.66689000 | 2.42766600  | 0.00000000  |
| H | 2.53692900  | 1.87581400  | 0.89719300  |
| C | 2.48035700  | 1.24326100  | 0.00000000  |
| H | 3.32051400  | 0.54265700  | 0.00000000  |
| H | 2.53692900  | 1.87581400  | -0.89719300 |
| H | 4.31509700  | -2.96411300 | 0.00000000  |
| H | -1.72753100 | -3.07720300 | 0.00000000  |

Sum of electronic and zero-point Energies= -871.227425  
Sum of electronic and thermal Energies= -871.211061  
Sum of electronic and thermal Enthalpies= -871.210116  
Sum of electronic and thermal Free Energies= -871.270326

**H\*LF(OH+-) S<sub>0</sub>**

|   |             |             |             |
|---|-------------|-------------|-------------|
| C | -2.56819800 | 2.38408700  | 0.00000000  |
| C | -2.45271000 | 1.01502100  | 0.00000000  |
| C | -1.18986200 | 0.37078200  | 0.00000000  |
| C | 0.00000000  | 1.16901000  | 0.00000000  |
| C | -0.11914000 | 2.56504600  | 0.00000000  |
| C | -1.36746600 | 3.17330700  | 0.00000000  |
| C | 1.27796600  | -0.82853300 | 0.00000000  |
| C | 0.03605600  | -1.53933500 | 0.00000000  |
| C | 0.17565400  | -2.98346800 | 0.00000000  |
| C | 2.42192200  | -2.76906400 | 0.00000000  |
| H | -3.33036700 | 0.36671700  | 0.00000000  |
| H | 0.76749800  | 3.19680000  | 0.00000000  |
| N | 1.21778000  | 0.53085900  | 0.00000000  |
| N | 2.46191100  | -1.43815300 | 0.00000000  |
| N | 1.34078300  | -3.57351000 | 0.00000000  |
| N | -1.15068700 | -0.96870100 | 0.00000000  |
| O | -0.92308900 | -3.69067100 | 0.00000000  |
| O | 3.56252500  | -3.41437300 | 0.00000000  |
| C | -1.46269000 | 4.66282900  | 0.00000000  |
| H | -2.02011800 | 5.01816900  | 0.88150200  |
| H | -0.47452200 | 5.13864800  | 0.00000000  |
| H | -2.02011800 | 5.01816900  | -0.88150200 |
| C | -3.91014300 | 3.04570500  | 0.00000000  |
| H | -4.03757900 | 3.68976000  | 0.88422000  |
| H | -4.03757900 | 3.68976000  | -0.88422000 |
| H | -4.71809100 | 2.30377000  | 0.00000000  |
| H | 2.48989200  | 1.94101400  | 0.89879300  |
| C | 2.45531900  | 1.31129700  | 0.00000000  |
| H | 3.29524900  | 0.61308500  | 0.00000000  |
| H | 2.48989200  | 1.94101400  | -0.89879300 |
| H | 4.27958000  | -2.75848100 | 0.00000000  |
| H | -0.66797900 | -4.63164600 | 0.00000000  |

Sum of electronic and zero-point Energies= -871.324135  
Sum of electronic and thermal Energies= -871.308301  
Sum of electronic and thermal Enthalpies= -871.307357  
Sum of electronic and thermal Free Energies= -871.366574

**H\*LF(OH+-) S<sub>1</sub>**

|   |             |             |             |
|---|-------------|-------------|-------------|
| C | -2.48706900 | 2.51379400  | 0.00000000  |
| C | -2.39224900 | 1.08689000  | 0.00000000  |
| C | -1.17504000 | 0.37943800  | 0.00000000  |
| C | 0.00000000  | 1.13905000  | 0.00000000  |
| C | -0.08678000 | 2.57317700  | 0.00000000  |
| C | -1.29648300 | 3.26797800  | 0.00000000  |
| C | 1.22974900  | -0.88912100 | 0.00000000  |
| C | -0.02306300 | -1.57412700 | 0.00000000  |
| C | 0.10701900  | -2.99938100 | 0.00000000  |
| C | 2.35246700  | -2.85279100 | 0.00000000  |
| H | -3.30461500 | 0.48530800  | 0.00000000  |
| H | 0.83653100  | 3.15334100  | 0.00000000  |
| N | 1.21855200  | 0.50120500  | 0.00000000  |
| N | 2.39776100  | -1.50262300 | 0.00000000  |
| N | 1.27565900  | -3.62407700 | 0.00000000  |
| N | -1.22512800 | -0.98345800 | 0.00000000  |
| O | -0.99427000 | -3.71512100 | 0.00000000  |
| O | 3.50741200  | -3.48267600 | 0.00000000  |
| C | -1.32259800 | 4.76356700  | 0.00000000  |
| H | -1.85122000 | 5.15297400  | 0.88470400  |
| H | -0.30955200 | 5.18501900  | 0.00000000  |
| H | -1.85122000 | 5.15297400  | -0.88470400 |
| C | -3.82107300 | 3.15952700  | 0.00000000  |
| H | -3.93450600 | 3.82125500  | 0.87741200  |
| H | -3.93450600 | 3.82125500  | -0.87741200 |
| H | -4.64012600 | 2.43110300  | 0.00000000  |
| H | 2.54811000  | 1.86826100  | 0.90029100  |
| C | 2.47309400  | 1.24152300  | 0.00000000  |
| H | 3.28770100  | 0.51263300  | 0.00000000  |
| H | 2.54811000  | 1.86826100  | -0.90029100 |
| H | 4.21043200  | -2.81326700 | 0.00000000  |
| H | -0.72603600 | -4.65121500 | 0.00000000  |

Sum of electronic and zero-point Energies= -871.228114  
Sum of electronic and thermal Energies= -871.211546  
Sum of electronic and thermal Enthalpies= -871.210602  
Sum of electronic and thermal Free Energies= -871.271793

**H\*LF(OH+-) S<sub>2</sub>**

|   |             |             |             |
|---|-------------|-------------|-------------|
| C | -2.51914700 | 2.49006200  | 0.00000000  |
| C | -2.45782800 | 1.10628400  | 0.00000000  |
| C | -1.22555300 | 0.43097300  | 0.00000000  |
| C | 0.00000000  | 1.18059500  | 0.00000000  |
| C | -0.08134200 | 2.56915400  | 0.00000000  |
| C | -1.30973100 | 3.23665500  | 0.00000000  |
| C | 1.25071800  | -0.87401100 | 0.00000000  |
| C | 0.00886000  | -1.58752400 | 0.00000000  |
| C | 0.11915900  | -3.01099800 | 0.00000000  |
| C | 2.38891300  | -2.88022000 | 0.00000000  |
| H | -3.36564300 | 0.50245200  | 0.00000000  |
| H | 0.82982200  | 3.16625900  | 0.00000000  |
| N | 1.21510600  | 0.48796400  | 0.00000000  |
| N | 2.38836100  | -1.54748700 | 0.00000000  |
| N | 1.28595500  | -3.61838000 | 0.00000000  |
| N | -1.10578300 | -0.89682400 | 0.00000000  |
| O | -1.00506000 | -3.69789000 | 0.00000000  |
| O | 3.53033400  | -3.53088500 | 0.00000000  |
| C | -1.34287500 | 4.73104700  | 0.00000000  |
| H | -1.87886400 | 5.11602800  | 0.88250700  |
| H | -0.33360300 | 5.16156000  | 0.00000000  |
| H | -1.87886400 | 5.11602800  | -0.88250700 |
| C | -3.84380000 | 3.18670200  | 0.00000000  |
| H | -3.95085400 | 3.83515600  | 0.88383500  |
| H | -3.95085400 | 3.83515600  | -0.88383500 |
| H | -4.67485500 | 2.47059700  | 0.00000000  |
| H | 2.51983900  | 1.87148200  | 0.89821000  |
| C | 2.46358300  | 1.24047500  | 0.00000000  |
| H | 3.29374400  | 0.52856800  | 0.00000000  |
| H | 2.51983900  | 1.87148200  | -0.89821000 |
| H | 4.25909000  | -2.89113500 | 0.00000000  |
| H | -0.78300400 | -4.64552100 | 0.00000000  |

Sum of electronic and zero-point Energies= -871.225108  
Sum of electronic and thermal Energies= -871.208552  
Sum of electronic and thermal Enthalpies= -871.207607  
Sum of electronic and thermal Free Energies= -871.268219

**H\*LF(O4-) S<sub>0</sub>**

|   |             |             |             |
|---|-------------|-------------|-------------|
| C | -2.59678500 | 2.34258500  | 0.00000000  |
| C | -2.45480600 | 0.97626500  | 0.00000000  |
| C | -1.17911900 | 0.35658600  | 0.00000000  |
| C | 0.00000000  | 1.17093800  | 0.00000000  |
| C | -0.14816300 | 2.56280600  | 0.00000000  |
| C | -1.40920400 | 3.14940900  | 0.00000000  |
| C | 1.33729000  | -0.81034100 | 0.00000000  |
| C | 0.08342400  | -1.52675400 | 0.00000000  |
| C | 0.19223600  | -2.96198100 | 0.00000000  |
| C | 2.65805700  | -2.70171600 | 0.00000000  |
| H | -3.32057600 | 0.31205400  | 0.00000000  |
| H | 0.72655900  | 3.21066700  | 0.00000000  |
| H | 1.56059500  | -4.48648000 | 0.00000000  |
| N | 1.23022900  | 0.55970900  | 0.00000000  |
| N | 2.52802500  | -1.35376600 | 0.00000000  |
| N | 1.40230600  | -3.47858100 | 0.00000000  |
| N | -1.11309300 | -0.98075900 | 0.00000000  |
| O | -0.90342300 | -3.66535400 | 0.00000000  |
| O | 3.66653100  | -3.34966000 | 0.00000000  |
| C | -1.52787300 | 4.63680400  | 0.00000000  |
| H | -2.09173600 | 4.98269700  | 0.88130900  |
| H | -0.54771000 | 5.12870100  | 0.00000000  |
| H | -2.09173600 | 4.98269700  | -0.88130900 |
| C | -3.95033400 | 2.98116900  | 0.00000000  |
| H | -4.09019500 | 3.62251100  | 0.88429800  |
| H | -4.09019500 | 3.62251100  | -0.88429800 |
| H | -4.74509600 | 2.22493600  | 0.00000000  |
| H | 2.47529100  | 1.99521400  | 0.89922100  |
| C | 2.45126000  | 1.36510600  | 0.00000000  |
| H | 3.30330200  | 0.68002200  | 0.00000000  |
| H | 2.47529100  | 1.99521400  | -0.89922100 |
| H | -0.73681400 | -4.62210200 | 0.00000000  |

Sum of electronic and zero-point Energies= -871.307077  
Sum of electronic and thermal Energies= -871.290966  
Sum of electronic and thermal Enthalpies= -871.290022  
Sum of electronic and thermal Free Energies= -871.349883

**H\*LF(O4-) S<sub>1</sub>**

|   |             |             |             |
|---|-------------|-------------|-------------|
| C | -2.50727900 | 2.46038900  | 0.00000000  |
| C | -2.40241900 | 1.04684200  | 0.00000000  |
| C | -1.18069600 | 0.37141200  | 0.00000000  |
| C | 0.00000000  | 1.15601900  | 0.00000000  |
| C | -0.09693900 | 2.56918800  | 0.00000000  |
| C | -1.32311900 | 3.23454400  | 0.00000000  |
| C | 1.27130500  | -0.85376700 | 0.00000000  |
| C | 0.01314500  | -1.56717400 | 0.00000000  |
| C | 0.12738300  | -2.97631300 | 0.00000000  |
| C | 2.55922500  | -2.79134700 | 0.00000000  |
| H | -3.30499100 | 0.43221400  | 0.00000000  |
| H | 0.81324300  | 3.16860300  | 0.00000000  |
| H | 1.48223400  | -4.54837500 | 0.00000000  |
| N | 1.22371700  | 0.51849500  | 0.00000000  |
| N | 2.45627400  | -1.41810500 | 0.00000000  |
| N | 1.35320600  | -3.53987600 | 0.00000000  |
| N | -1.19021400 | -0.99062900 | 0.00000000  |
| O | -0.96794100 | -3.70068200 | 0.00000000  |
| O | 3.61016100  | -3.38219500 | 0.00000000  |
| C | -1.37832100 | 4.72929400  | 0.00000000  |
| H | -1.91520300 | 5.10884100  | 0.88409400  |
| H | -0.37373500 | 5.17076200  | 0.00000000  |
| H | -1.91520300 | 5.10884100  | -0.88409400 |
| C | -3.84745500 | 3.10254600  | 0.00000000  |
| H | -3.96827700 | 3.75902800  | 0.87915700  |
| H | -3.96827700 | 3.75902800  | -0.87915700 |
| H | -4.65967300 | 2.36609800  | 0.00000000  |
| H | 2.51578400  | 1.91348400  | 0.89961800  |
| C | 2.46869000  | 1.28459500  | 0.00000000  |
| H | 3.30089600  | 0.57603800  | 0.00000000  |
| H | 2.51578400  | 1.91348400  | -0.89961800 |
| H | -0.78234500 | -4.65158500 | 0.00000000  |

Sum of electronic and zero-point Energies= -871.224855  
Sum of electronic and thermal Energies= -871.208089  
Sum of electronic and thermal Enthalpies= -871.207144  
Sum of electronic and thermal Free Energies= -871.268480

**H\*LF(O4-) S<sub>2</sub>**

|   |             |             |             |
|---|-------------|-------------|-------------|
| C | -2.53083800 | 2.46227500  | 0.00000000  |
| C | -2.44808300 | 1.08165100  | 0.00000000  |
| C | -1.20276900 | 0.42045300  | 0.00000000  |
| C | 0.00000000  | 1.19331800  | 0.00000000  |
| C | -0.09330200 | 2.57941000  | 0.00000000  |
| C | -1.33221800 | 3.22817700  | 0.00000000  |
| C | 1.28556400  | -0.83345900 | 0.00000000  |
| C | 0.03160100  | -1.59176000 | 0.00000000  |
| C | 0.13557200  | -2.98733300 | 0.00000000  |
| C | 2.58602900  | -2.85203300 | 0.00000000  |
| H | -3.34640000 | 0.46357800  | 0.00000000  |
| H | 0.80864900  | 3.19012800  | 0.00000000  |
| H | 1.47304100  | -4.57338000 | 0.00000000  |
| N | 1.22525800  | 0.51116500  | 0.00000000  |
| N | 2.40652500  | -1.49178000 | 0.00000000  |
| N | 1.35838000  | -3.56264300 | 0.00000000  |
| N | -1.09832900 | -0.90834600 | 0.00000000  |
| O | -0.97642600 | -3.69516600 | 0.00000000  |
| O | 3.63603600  | -3.42906400 | 0.00000000  |
| C | -1.38833600 | 4.72157500  | 0.00000000  |
| H | -1.93064100 | 5.09815100  | 0.88235100  |
| H | -0.38599200 | 5.16795800  | 0.00000000  |
| H | -1.93064100 | 5.09815100  | -0.88235100 |
| C | -3.86589900 | 3.13997300  | 0.00000000  |
| H | -3.98298100 | 3.78638900  | 0.88397000  |
| H | -3.98298100 | 3.78638900  | -0.88397000 |
| H | -4.68600900 | 2.41127200  | 0.00000000  |
| H | 2.52342900  | 1.90176800  | 0.89901800  |
| C | 2.47292700  | 1.27264800  | 0.00000000  |
| H | 3.30767400  | 0.56334200  | 0.00000000  |
| H | 2.52342900  | 1.90176800  | -0.89901800 |
| H | -0.81178100 | -4.64981700 | 0.00000000  |

Sum of electronic and zero-point Energies= -871.211420  
Sum of electronic and thermal Energies= -871.194830  
Sum of electronic and thermal Enthalpies= -871.193885  
Sum of electronic and thermal Free Energies= -871.254532
